# Supplementary material for: Coumarin-Annulated Ferrocenyl 1,3-Oxazine Derivatives Possessing In Vitro Antimalarial and Antitrypanosomal Potency
Source: MDPI journal article supplement (doi:10.3390/molecules26051333), 2021-03-02
Supplement: s1 [file s1]

## Supporting Information:

# Coumarin-annulated ferrocenyl 1,3-oxazine derivatives possessing *in vitro* antimalarial and antitrypanosomal potency

Mziyanda Mbaba <sup>1</sup>, Laura M.K. Dingle <sup>2,3</sup>, Ayanda I. Zulu <sup>1</sup>, Dustin Laming <sup>2,4</sup>, Tarryn Swart <sup>2,4</sup>, Jo-Anne de La Mare <sup>2,3,4</sup>, Heinrich C. Hoppe <sup>2,4</sup>, Adrienne L. Edkins <sup>2,3,4</sup> and Setshaba D. Khanye <sup>1,4,5,\*</sup>

<sup>1</sup> Department of Chemistry, Faculty of Science, Rhodes University, Makhanda, 6140;

[mziyanda.mbaba@uct.ac.za](mailto:mziyanda.mbaba@uct.ac.za) (M.M.); [azulu50@gmail.com](mailto:azulu50@gmail.com) (A.I.Z.); [s.khanye@ru.ac.za](mailto:s.khanye@ru.ac.za) (S.D.K.)

<sup>2</sup> Department of Biochemistry and Microbiology, Faculty of Science, Rhodes University, Makhanda, 6140;

[dustinlaming89@gmail.com](mailto:dustinlaming89@gmail.com) (D.L.); [g10s2905@campus.ru.ac.za](mailto:g10s2905@campus.ru.ac.za) (T.S.); [g11d1612@campus.ru.ac.za](mailto:g11d1612@campus.ru.ac.za) (L.M.K.D.);

[j.delamare@ru.ac.za](mailto:j.delamare@ru.ac.za) (J.DLM.); [h.hoppe@ru.ac.za](mailto:h.hoppe@ru.ac.za) (H.C.H.); [a.edkins@ru.ac.za](mailto:a.edkins@ru.ac.za) (A.L.E.)

<sup>3</sup> Biomedical Biotechnology Research Unit, Rhodes University, Makhanda, 6140

<sup>4</sup> Centre for Chemo- and Biomedicinal Research, Rhodes University, Makhanda, 6140

<sup>5</sup> Division of Pharmaceutical Chemistry, Faculty of Pharmacy, Rhodes University, Makhanda, 6140

\* Correspondence: [s.khanye@ru.ac.za](mailto:s.khanye@ru.ac.za); Tel.: +27-46-603-8397

## Table of contents

|                                                                  |     |
|------------------------------------------------------------------|-----|
| General cytotoxicity evaluation assay against the HeLa cell line | (3) |
| Figure S1                                                        | (3) |
| NMR spectral data of investigated compounds                      | (4) |

### General cytotoxicity evaluation assay against the HeLa cell line

HeLa cells (Cellonex, South Africa) were cultured in Dulbecco's modified Eagle's medium (Lonza, Switzerland) containing 10% foetal calf serum and antibiotics (penicillin, streptomycin and amphotericin B) in a 5% CO<sub>2</sub> incubator kept at 37°C. Equal densities of the cells were seeded in a 96-well plate and incubated 24 hours. The seeded cells in the wells were treated with a fixed concentration (20 µM) of test compound and further incubated under the same conditions for 48 hours. The viability of cells in each treated well was measured on a SpectraMax M3 microplate reader employing the resazurin procedure as previously described [1].

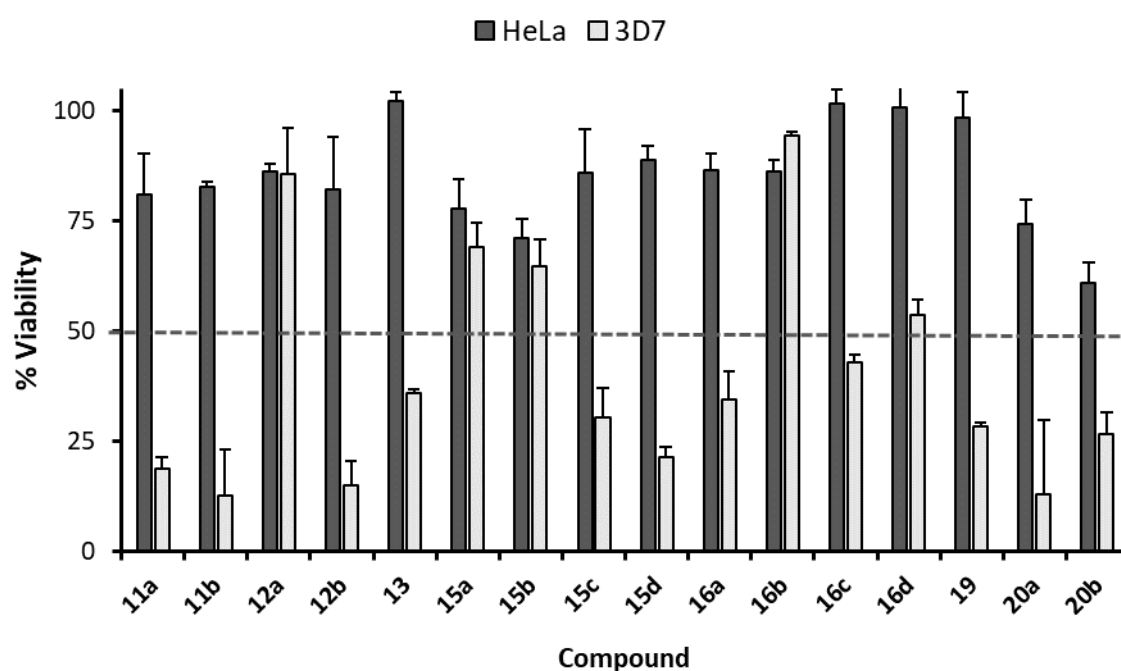

**Figure S1.** Results of preliminary cytotoxicity evaluation assay showing percentage viability of HeLa cells plotted in parallel with percentage growth of 3D7 *P. falciparum* parasites treated with 20 µM fixed concentration of the test compounds.

### $^1\text{H}$ NMR spectrum of compound **11a**

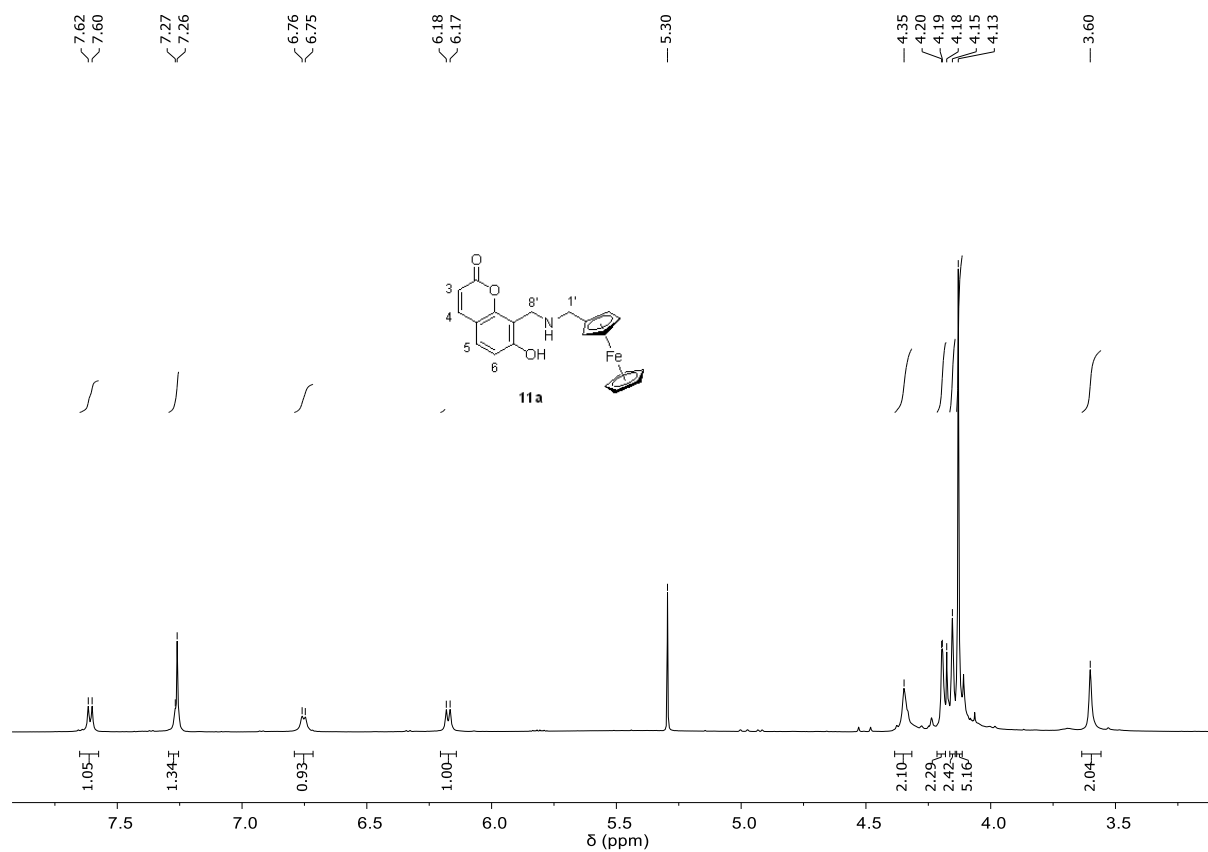

### $^{13}\text{C}$ NMR spectrum of compound **11a**

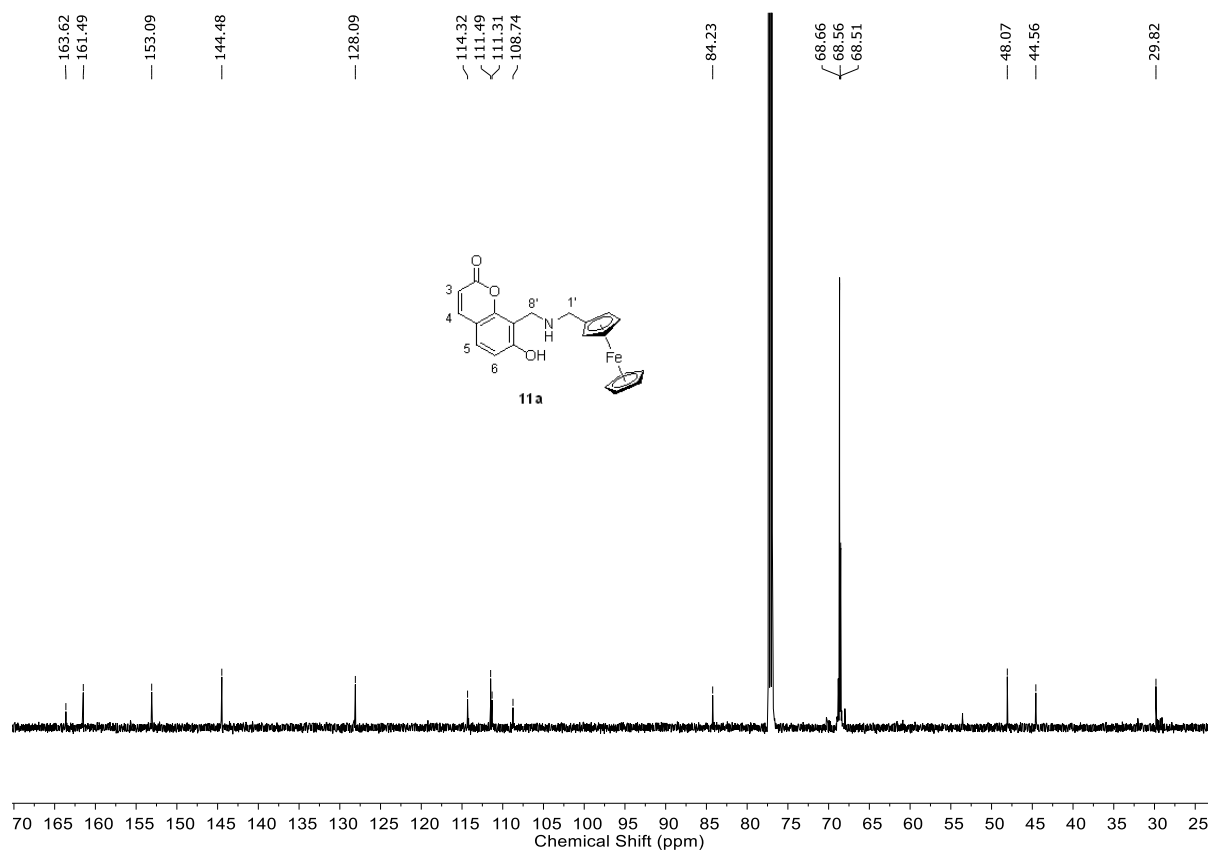

$^1\text{H}$  NMR spectrum of compound **11b**

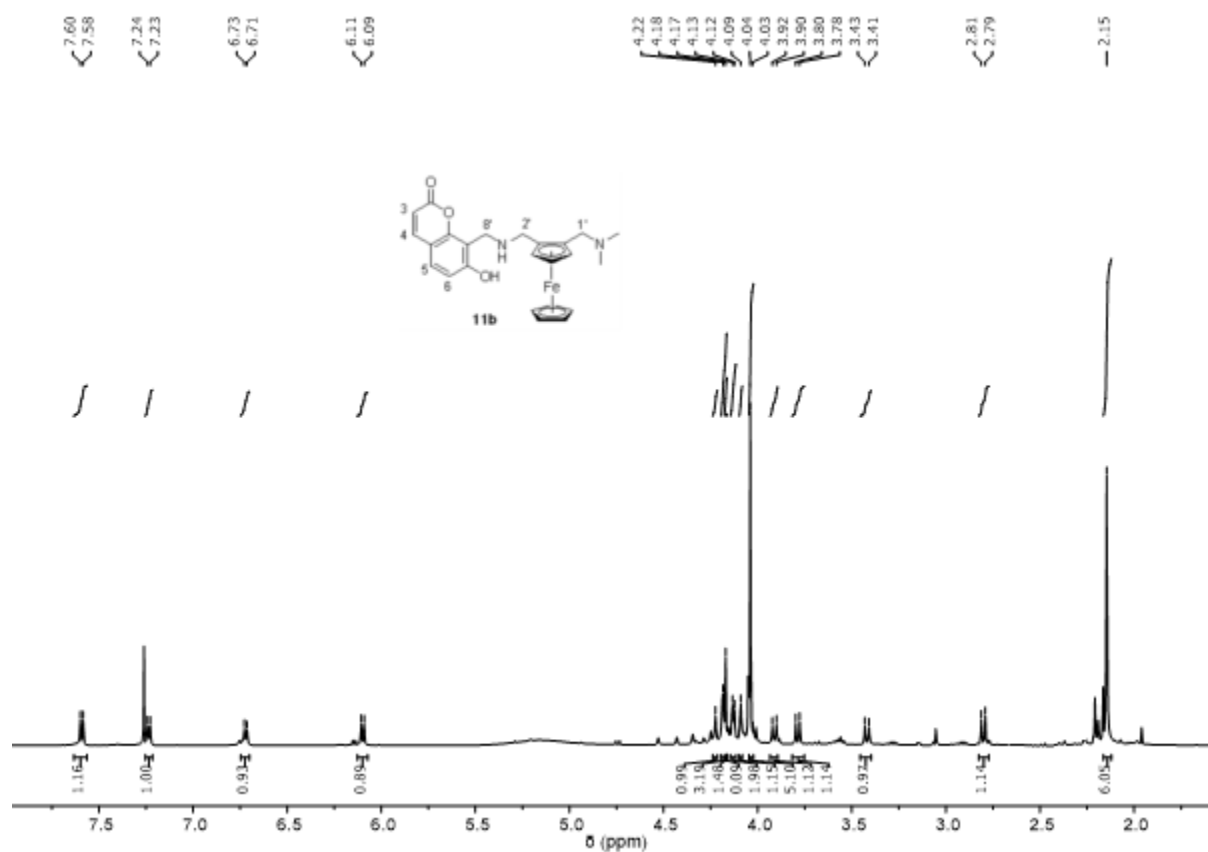

$^{13}\text{C}$  NMR spectrum of compound **11b**

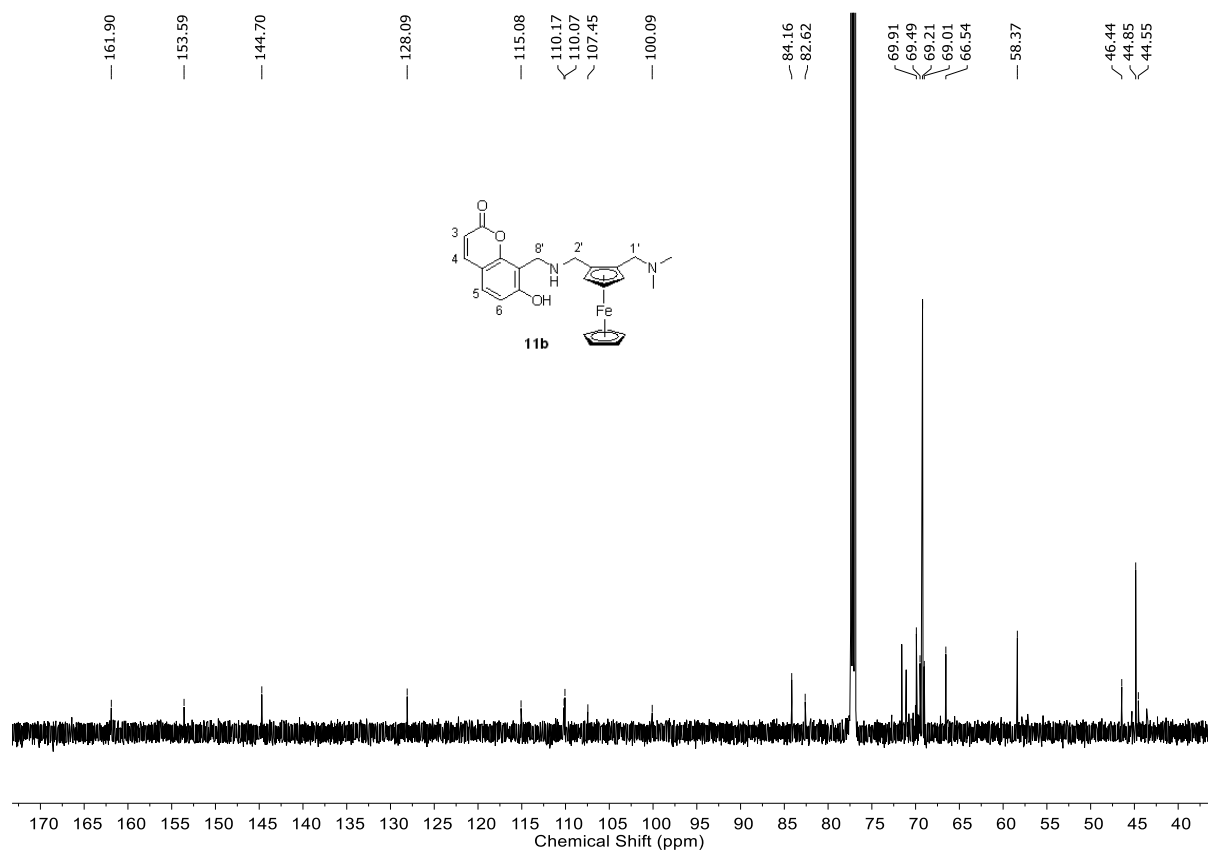

### $^1\text{H}$ NMR spectrum of compound **12a**

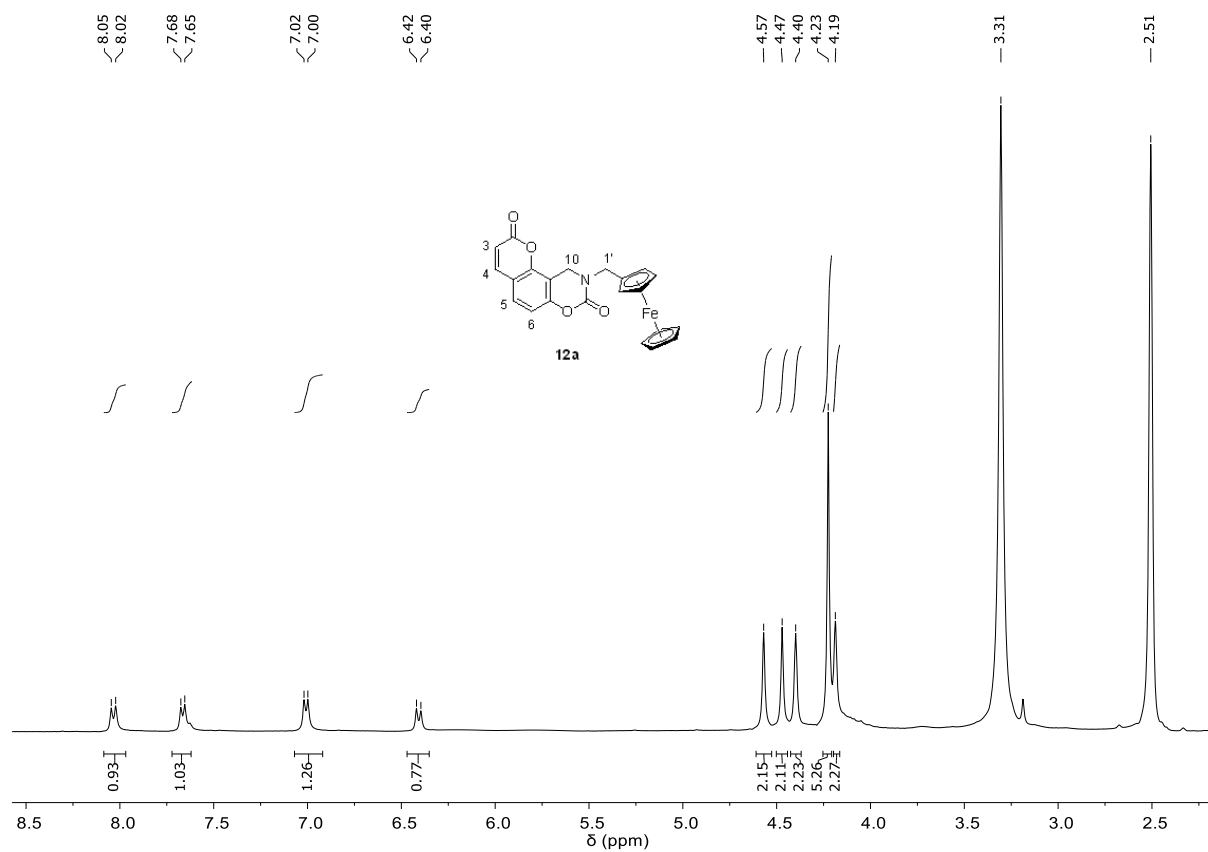

### $^{13}\text{C}$ NMR spectrum of compound **12a**

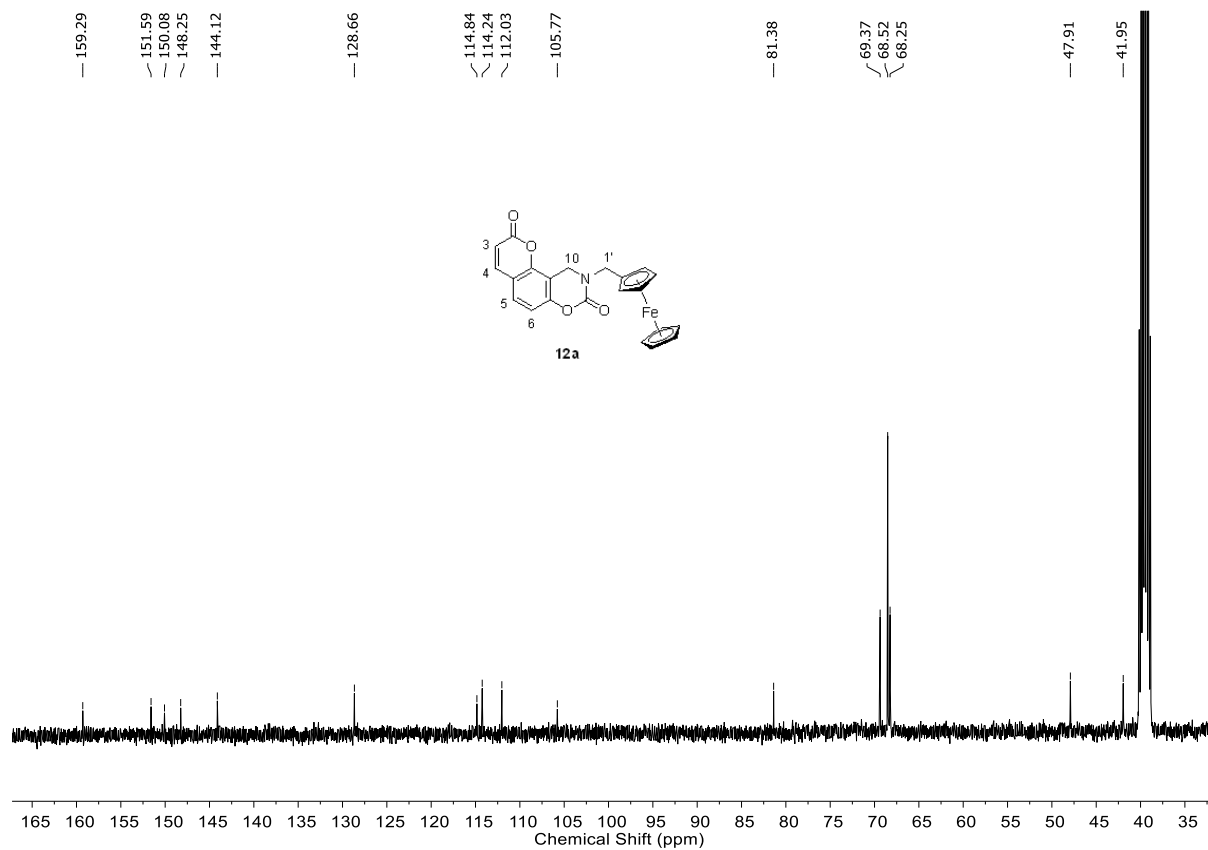

### <sup>1</sup>H NMR spectrum of compound **12b**

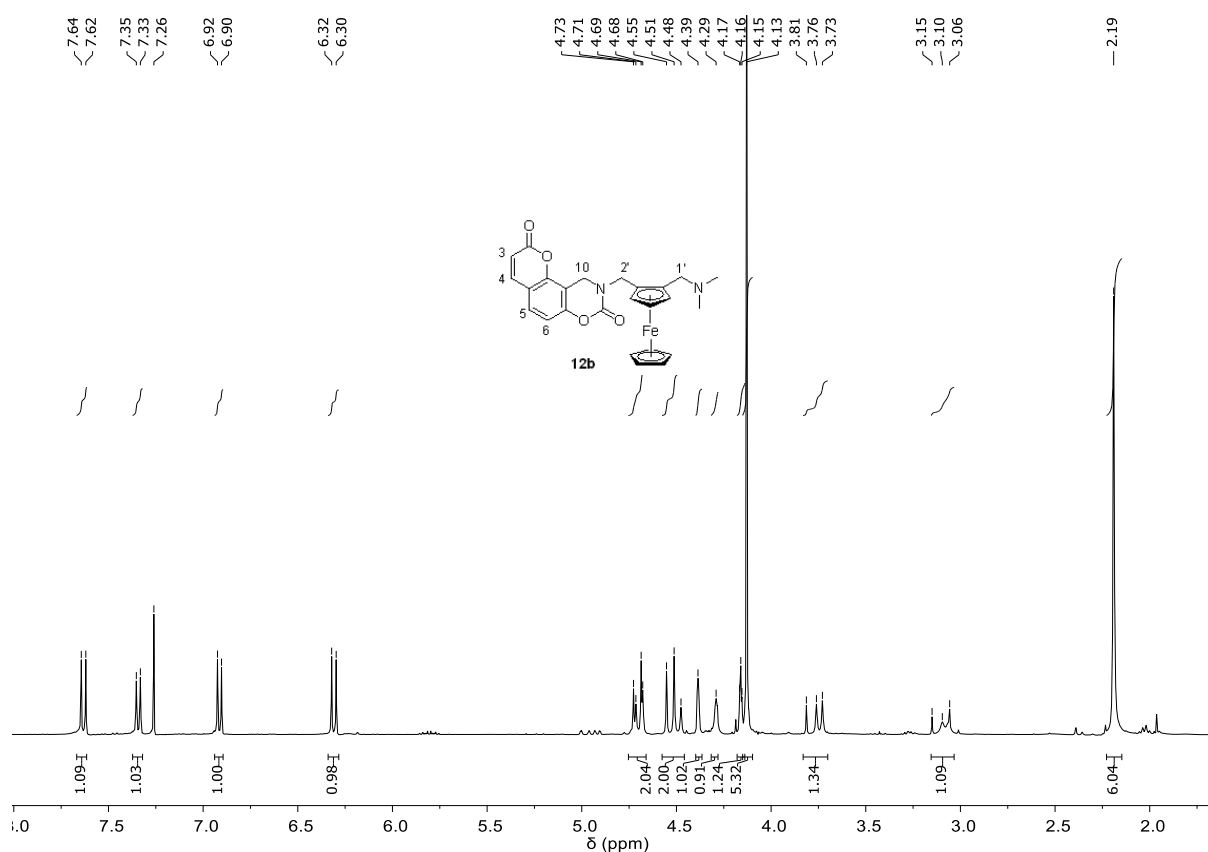

### <sup>13</sup>C NMR spectrum of compound **12b**

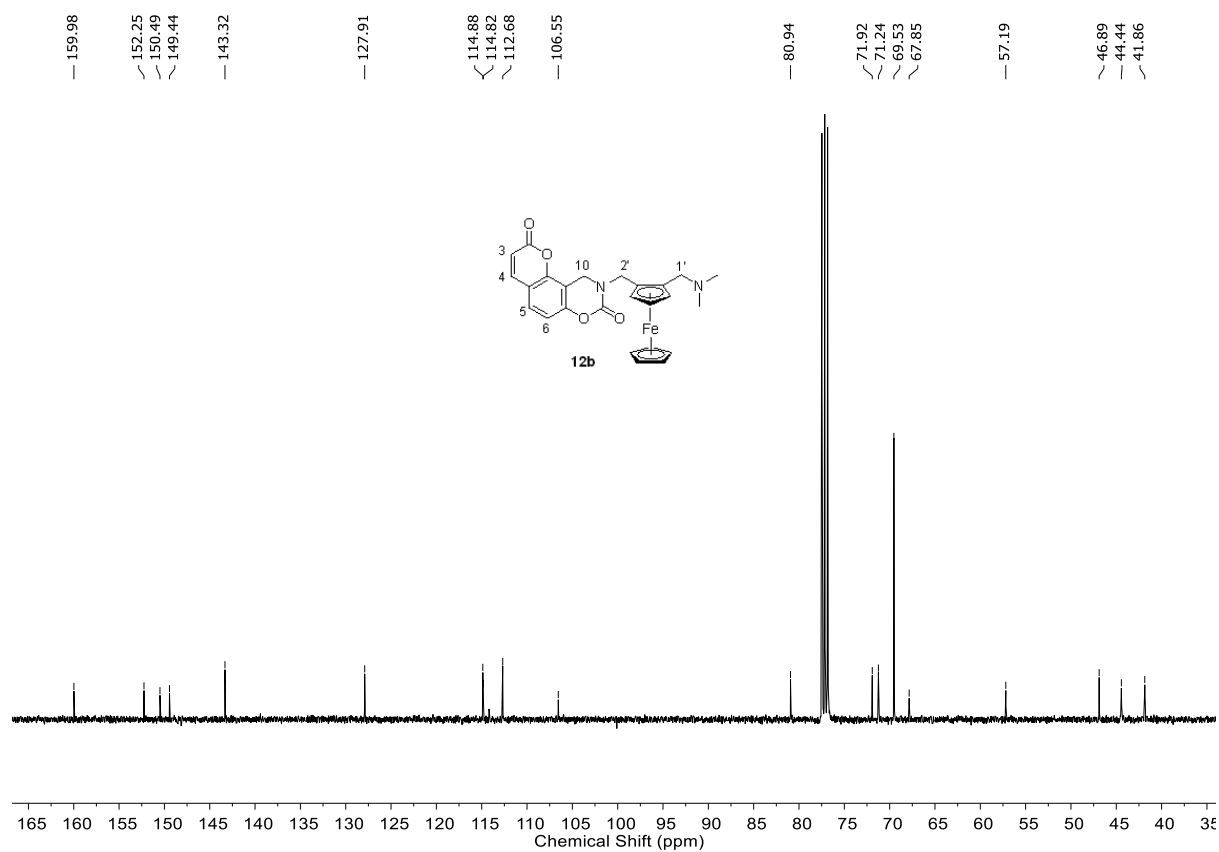

### <sup>1</sup>H NMR spectrum of compound 13

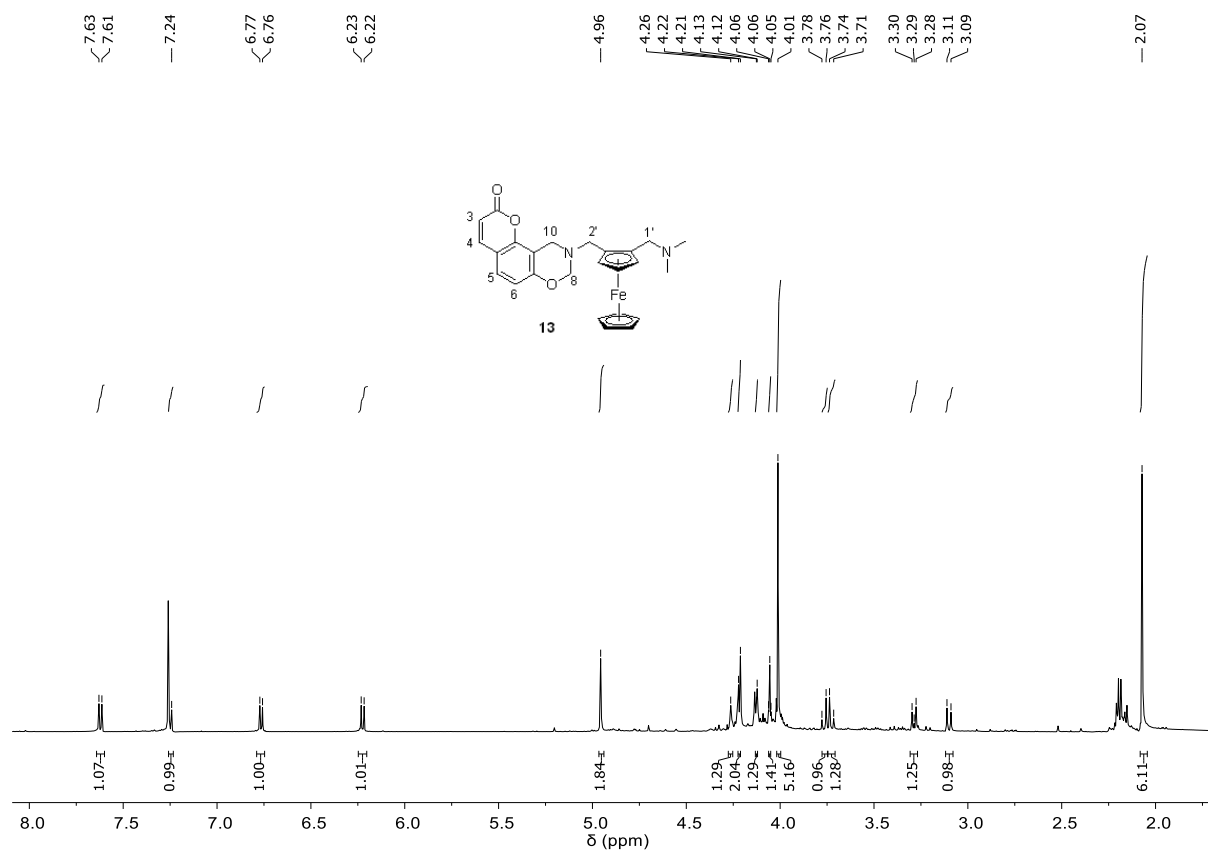

### <sup>13</sup>C NMR spectrum of compound 13

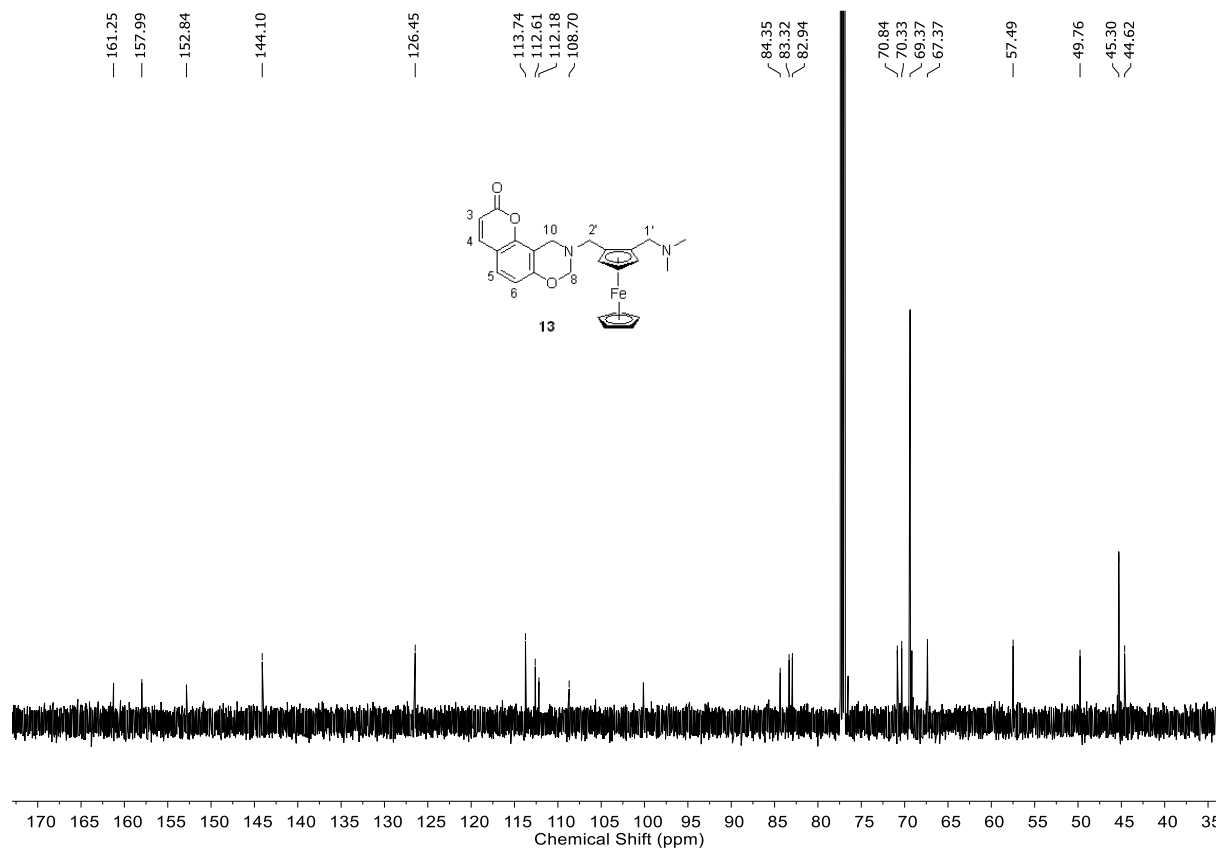



### <sup>1</sup>H NMR spectrum of compound **15a**

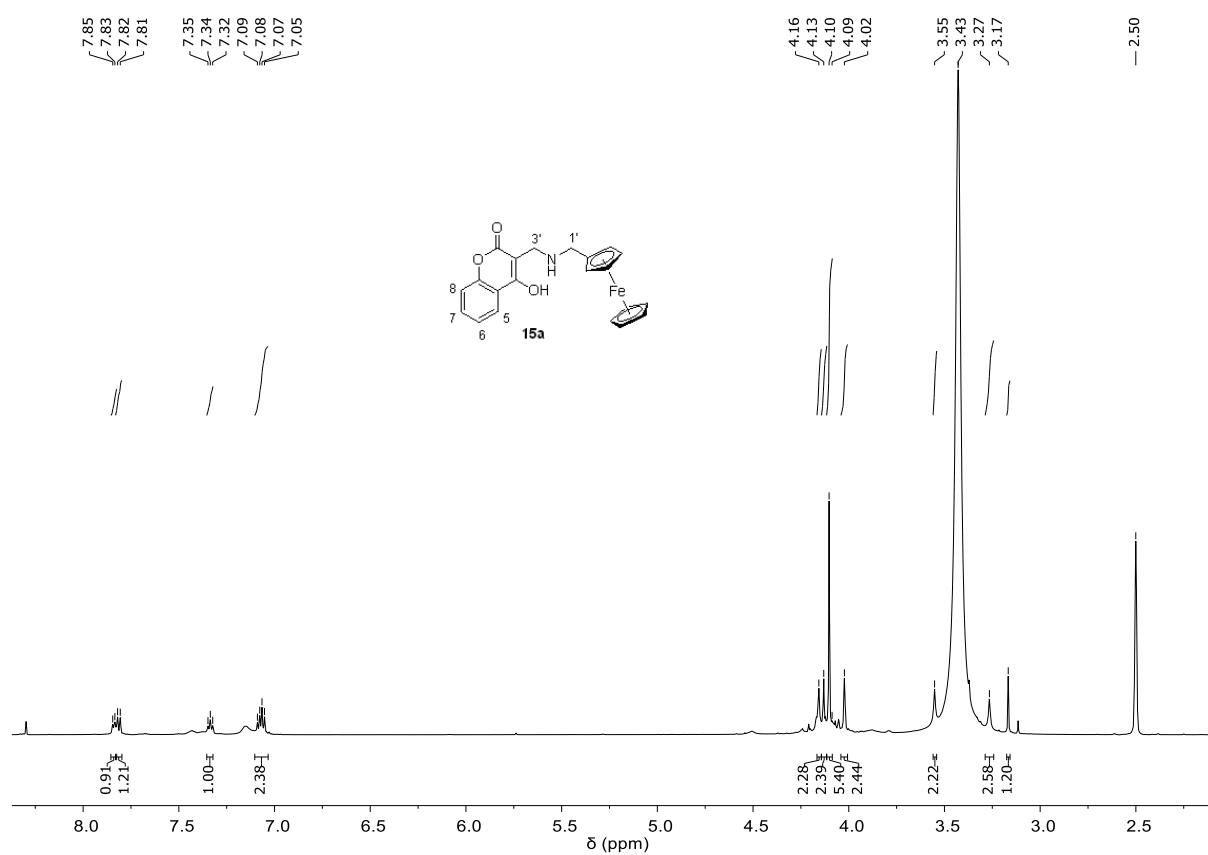

### <sup>13</sup>C NMR spectrum of compound **15a**

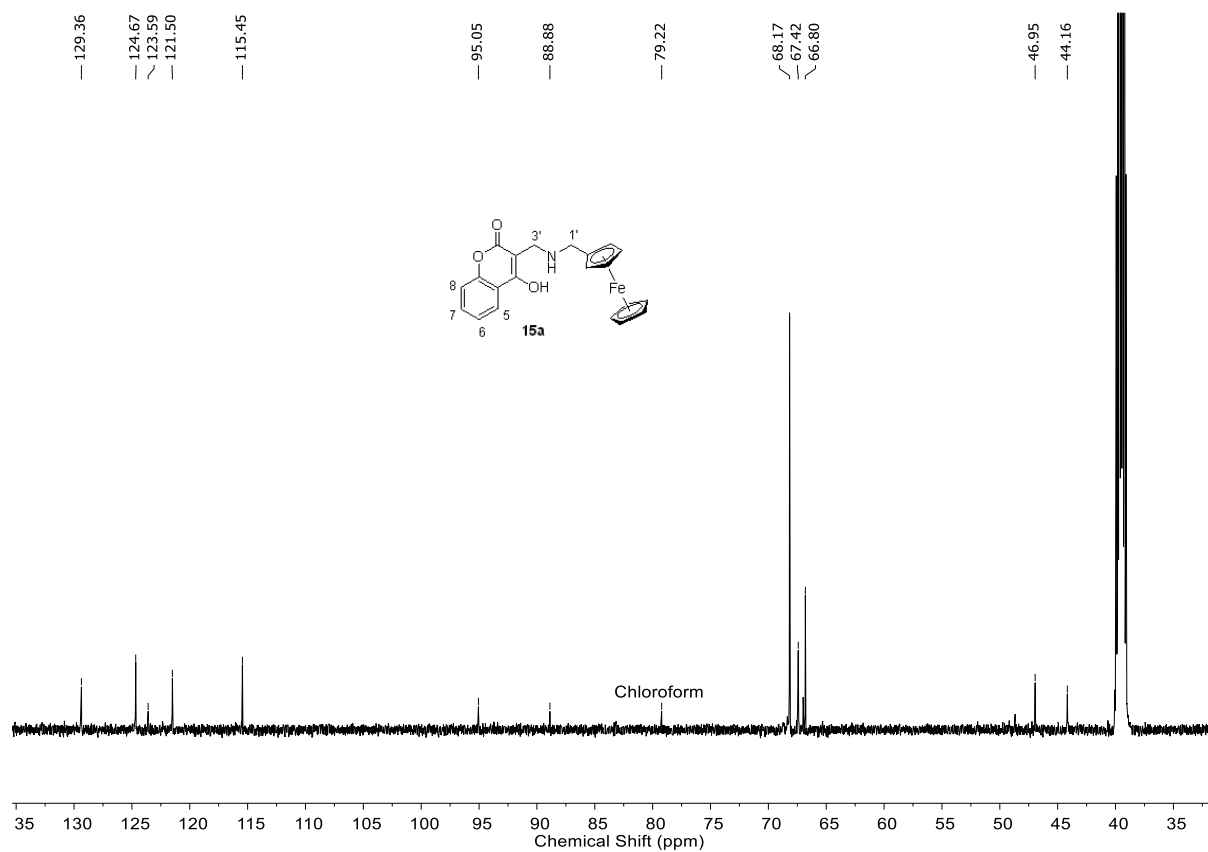

<sup>1</sup>H NMR spectrum of compound **15b**

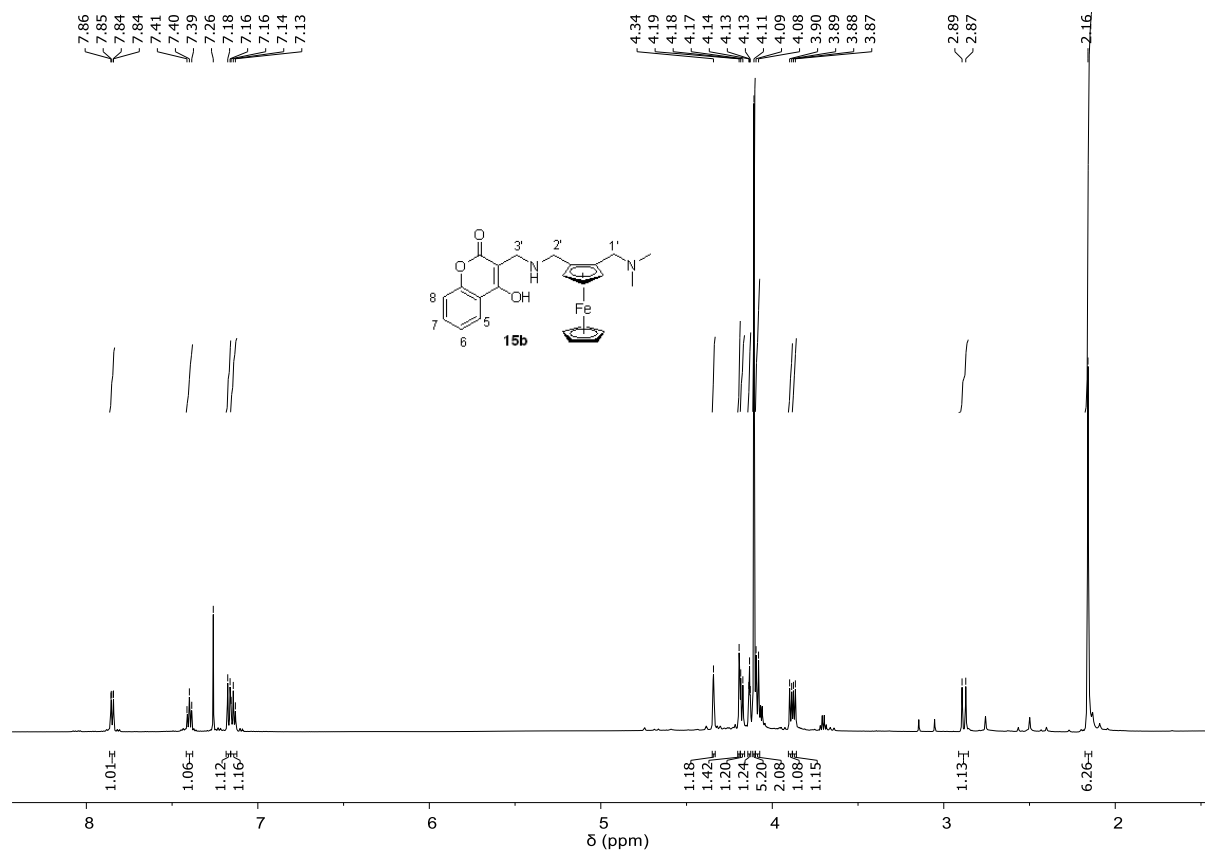

<sup>13</sup>C NMR spectrum of compound **15b**

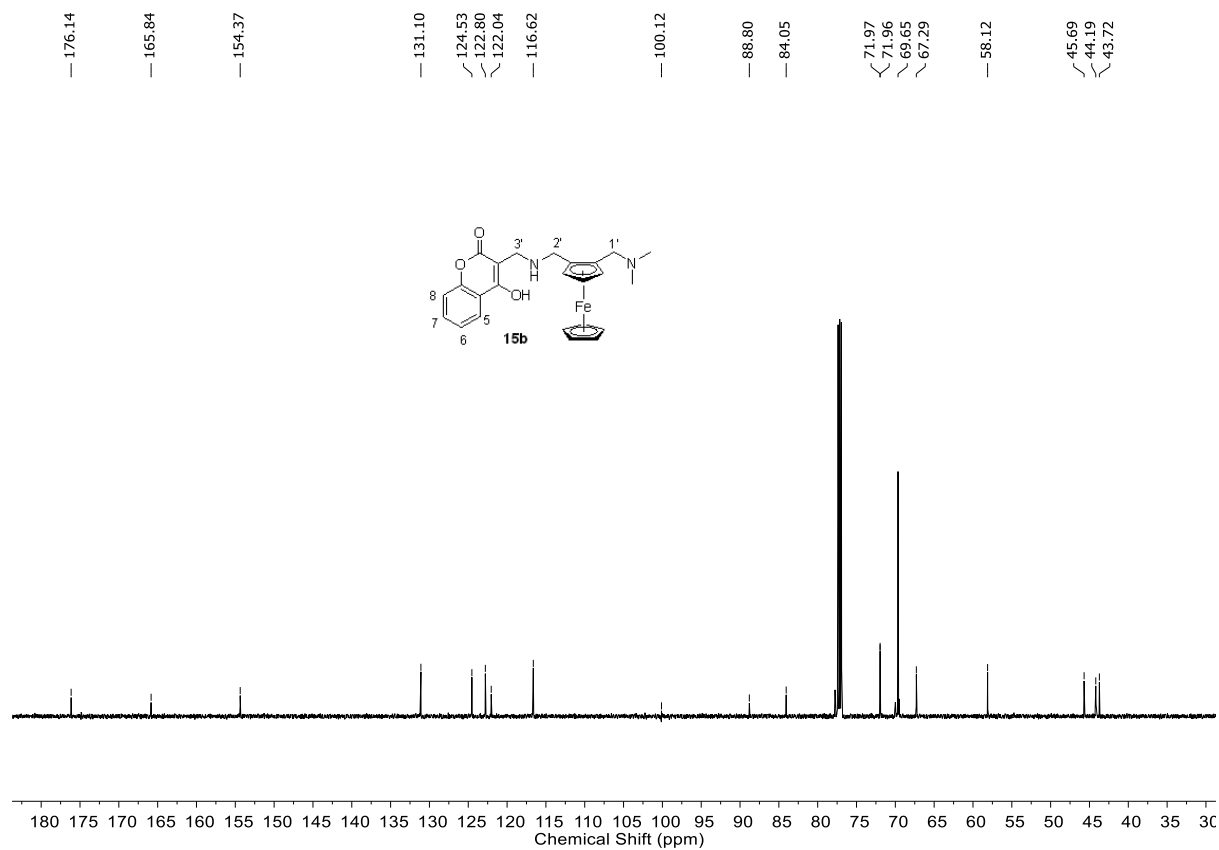

### $^1\text{H}$ NMR spectrum of compound **15c**

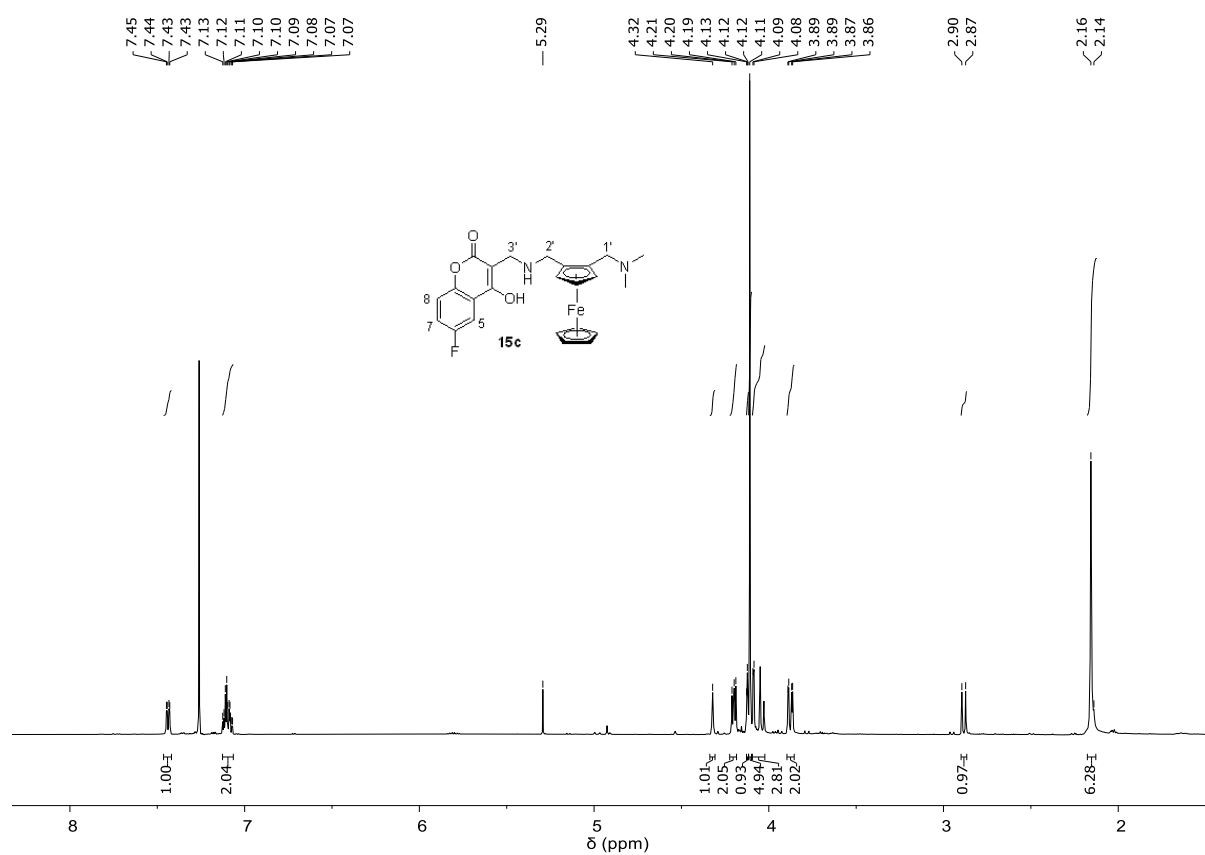

### $^{13}\text{C}$ NMR spectrum of compound **15c**

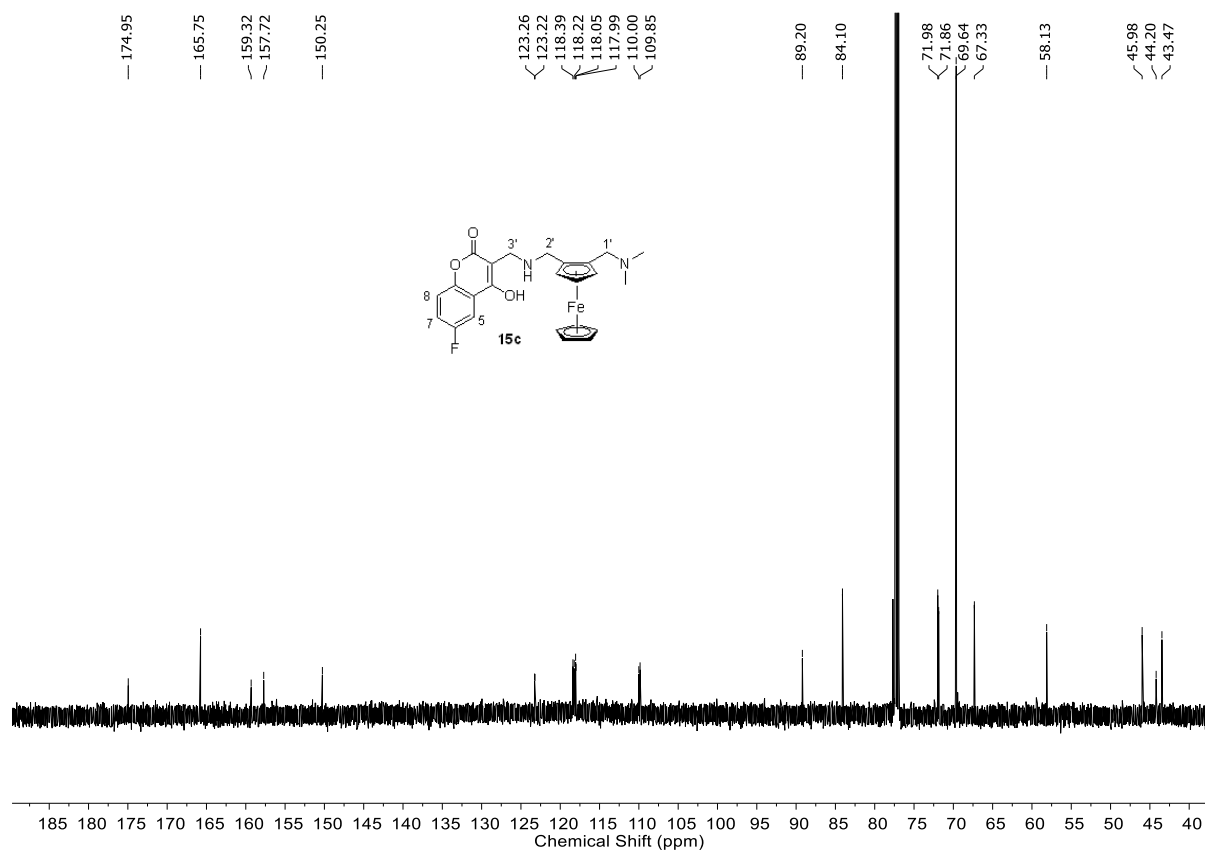

<sup>1</sup>H NMR spectrum of compound **15d**

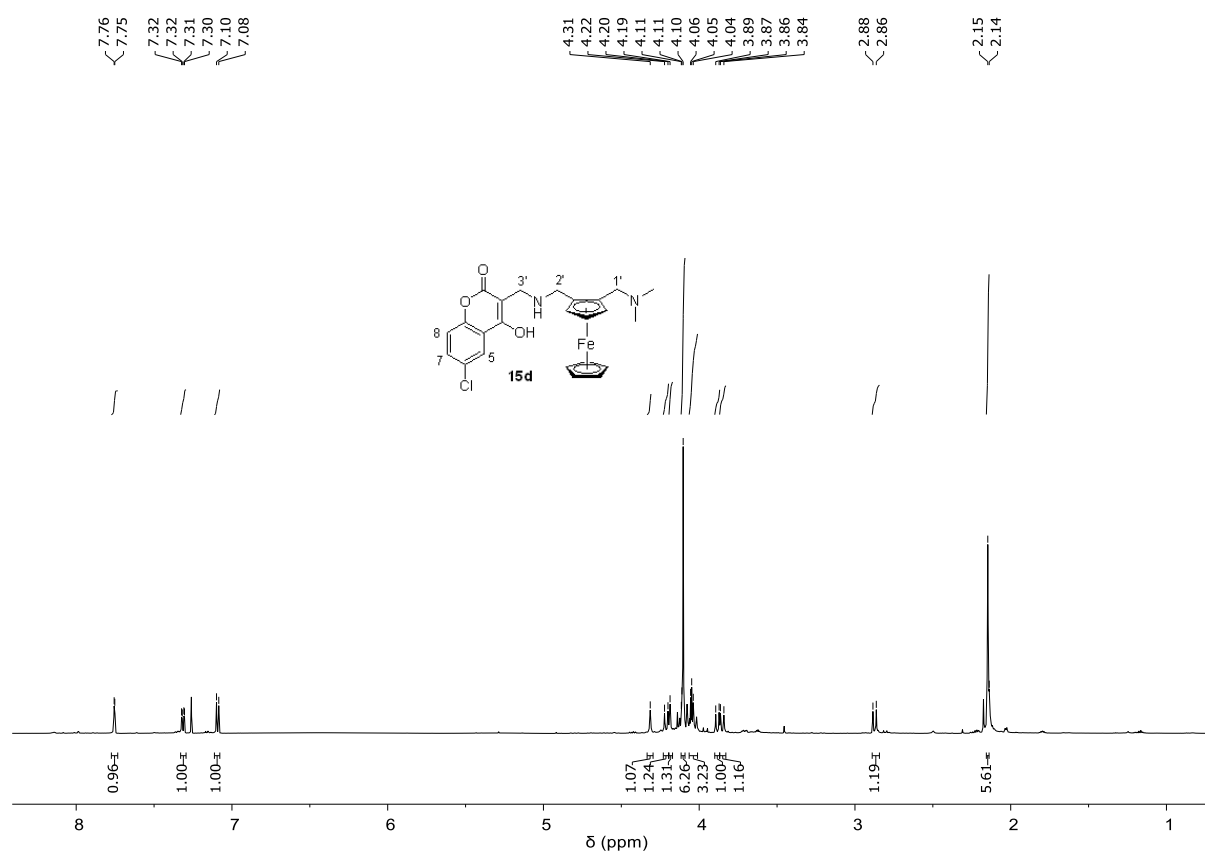

<sup>13</sup>C NMR spectrum of compound **15d**

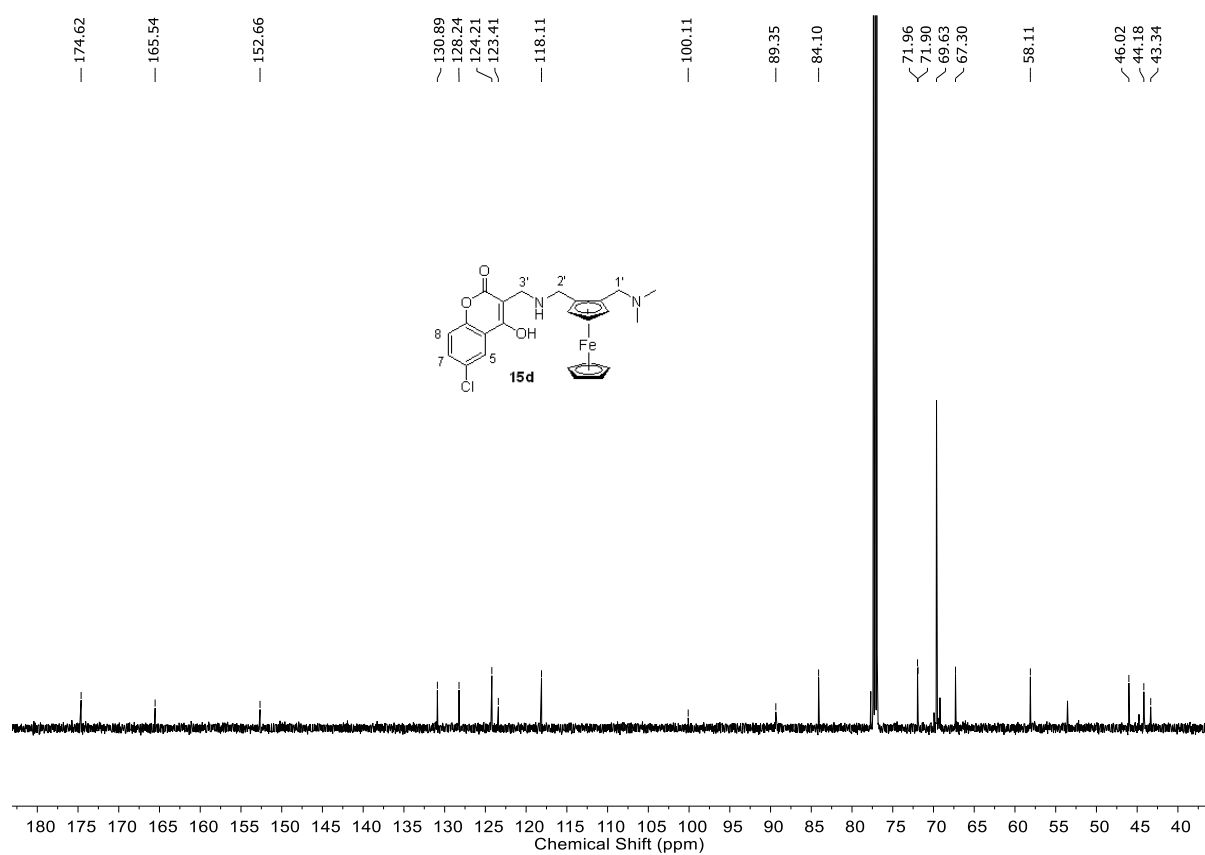

### $^1\text{H}$ NMR spectrum of compound **16a**

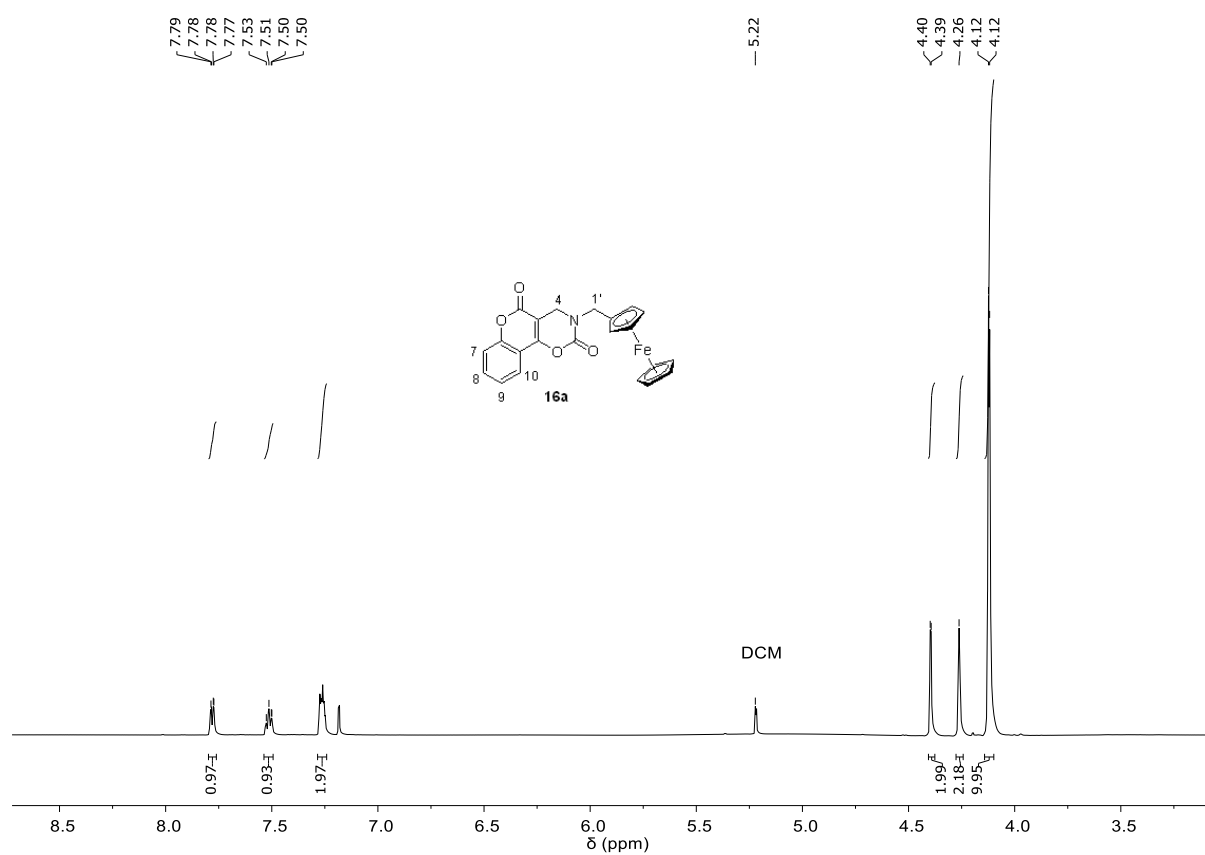

### $^{13}\text{C}$ NMR spectrum of compound **16a**

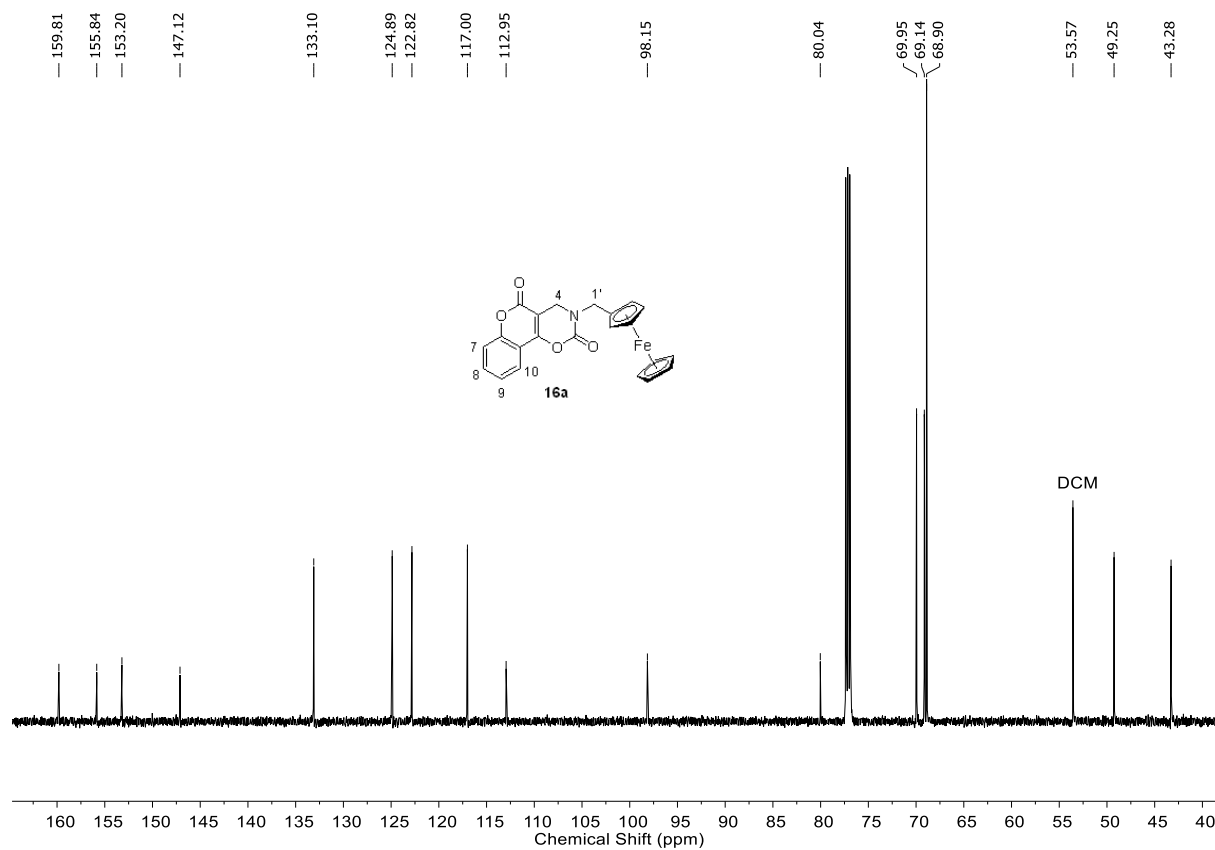

### <sup>1</sup>H NMR spectrum of compound **16b**

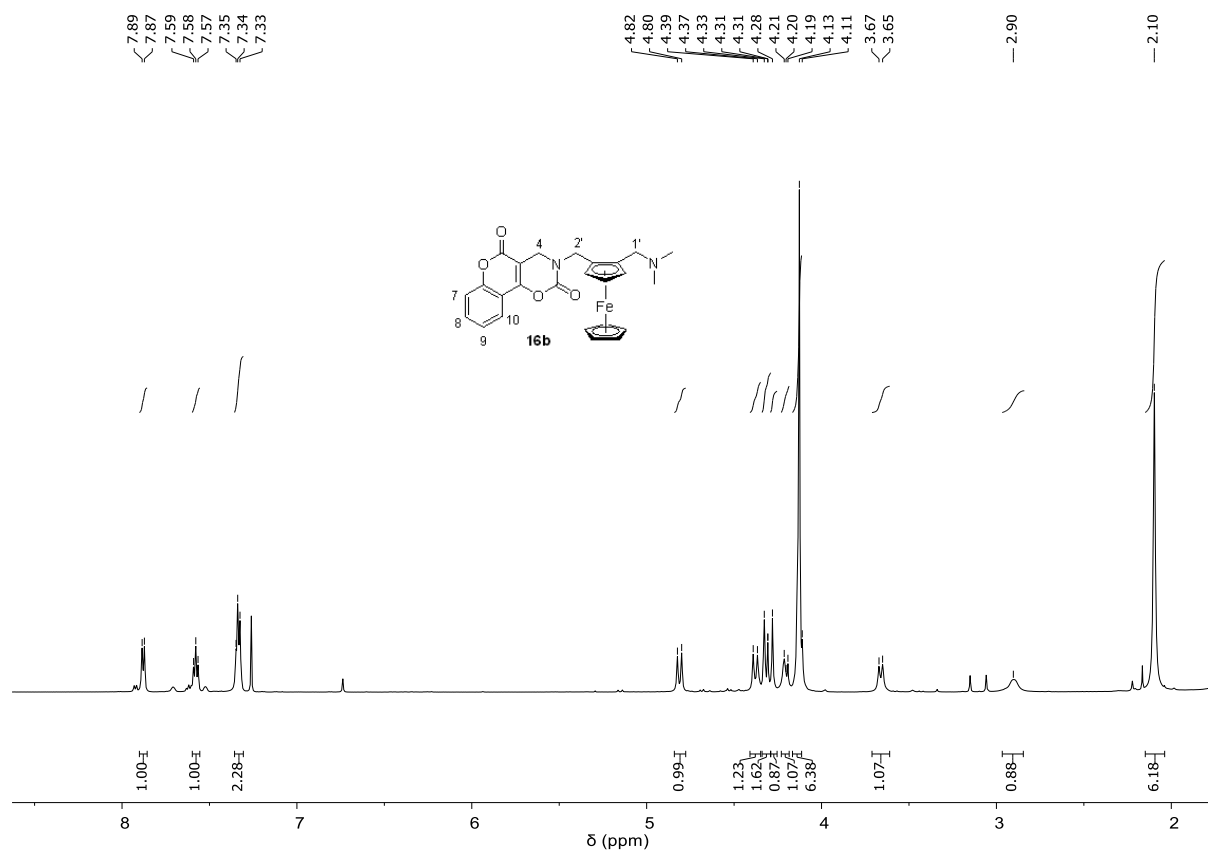

### <sup>13</sup>C NMR spectrum of compound **16b**

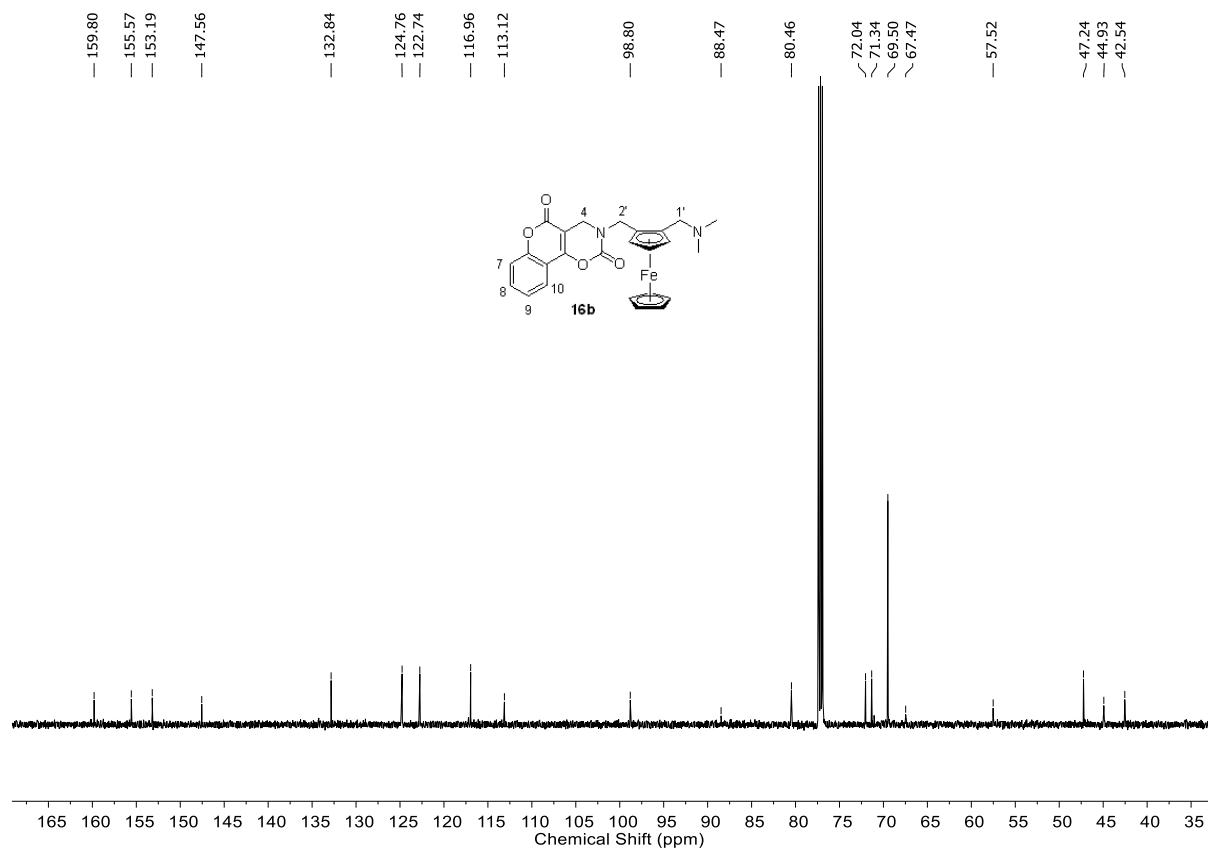

### $^1\text{H}$ NMR spectrum of compound **16c**

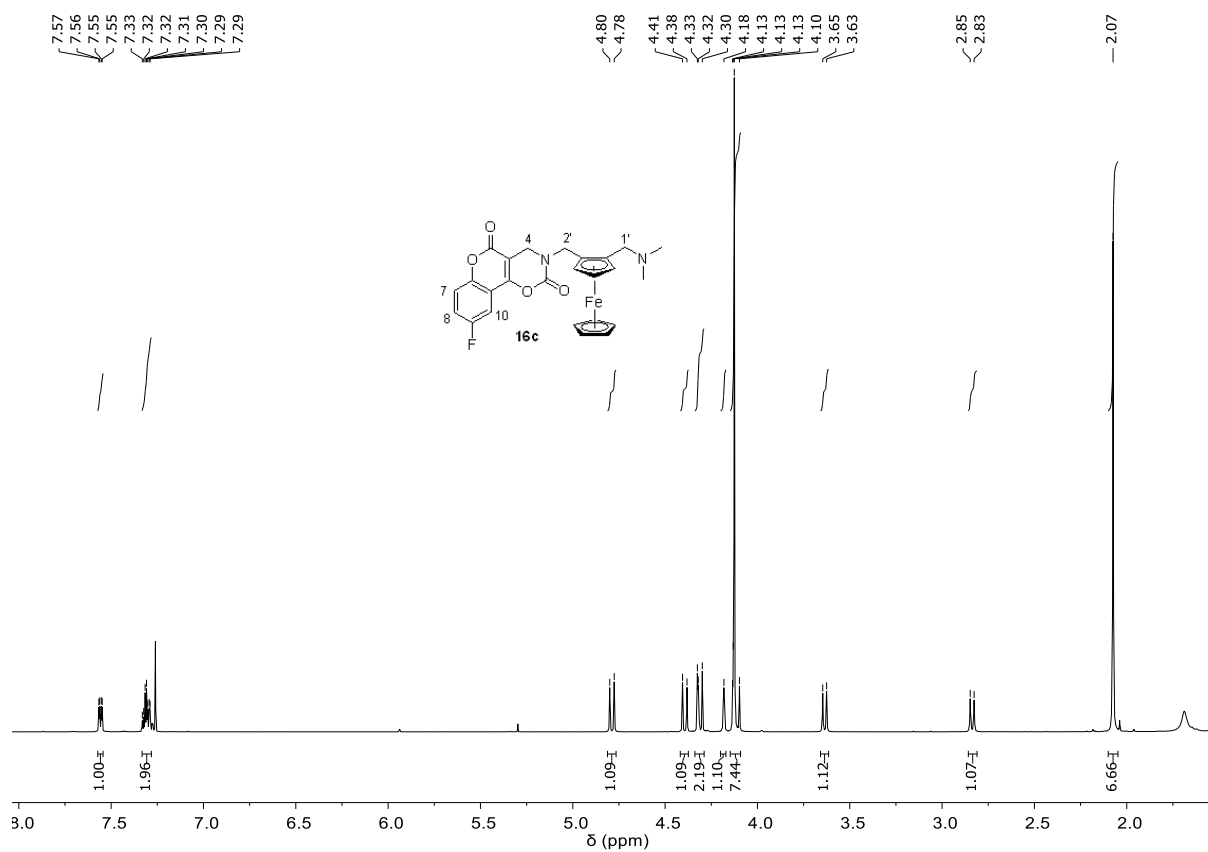

### $^{13}\text{C}$ NMR spectrum of compound **16c**

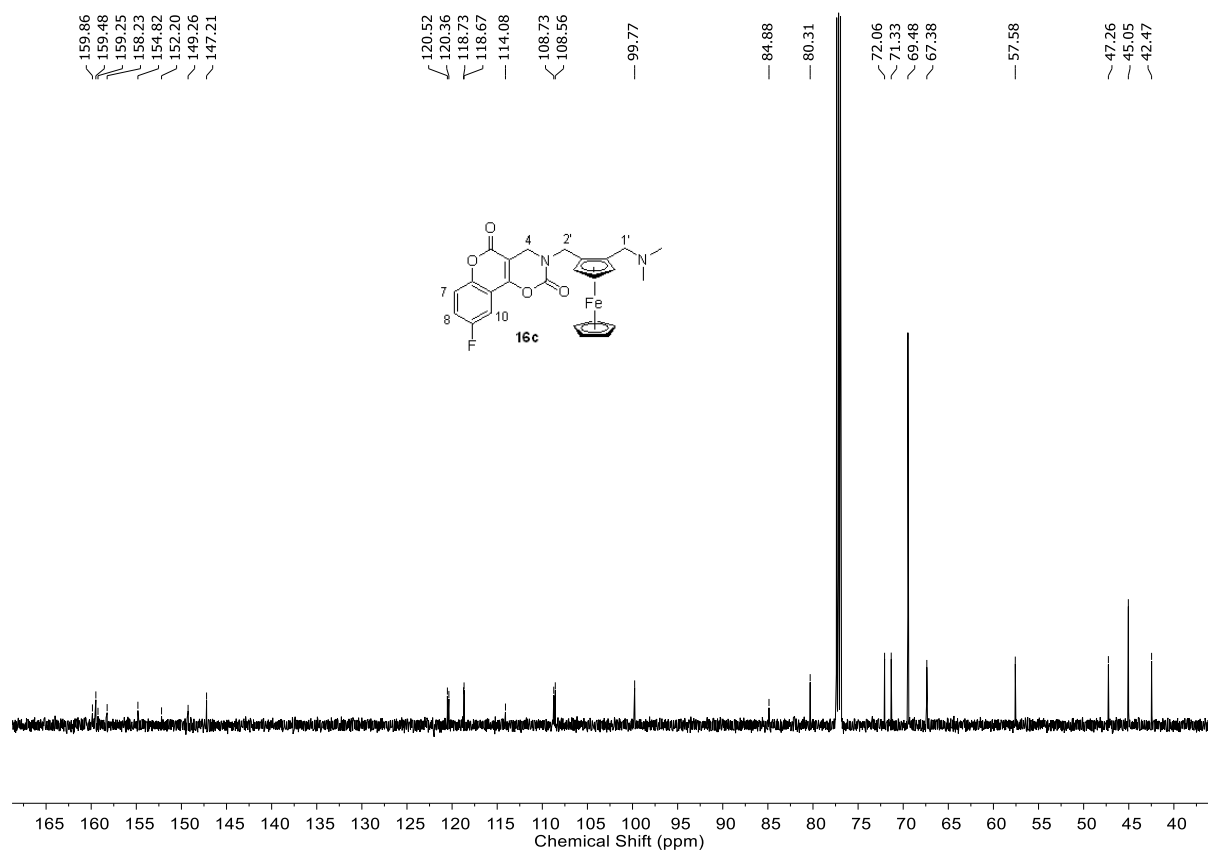

### <sup>1</sup>H NMR spectrum of compound **16d**

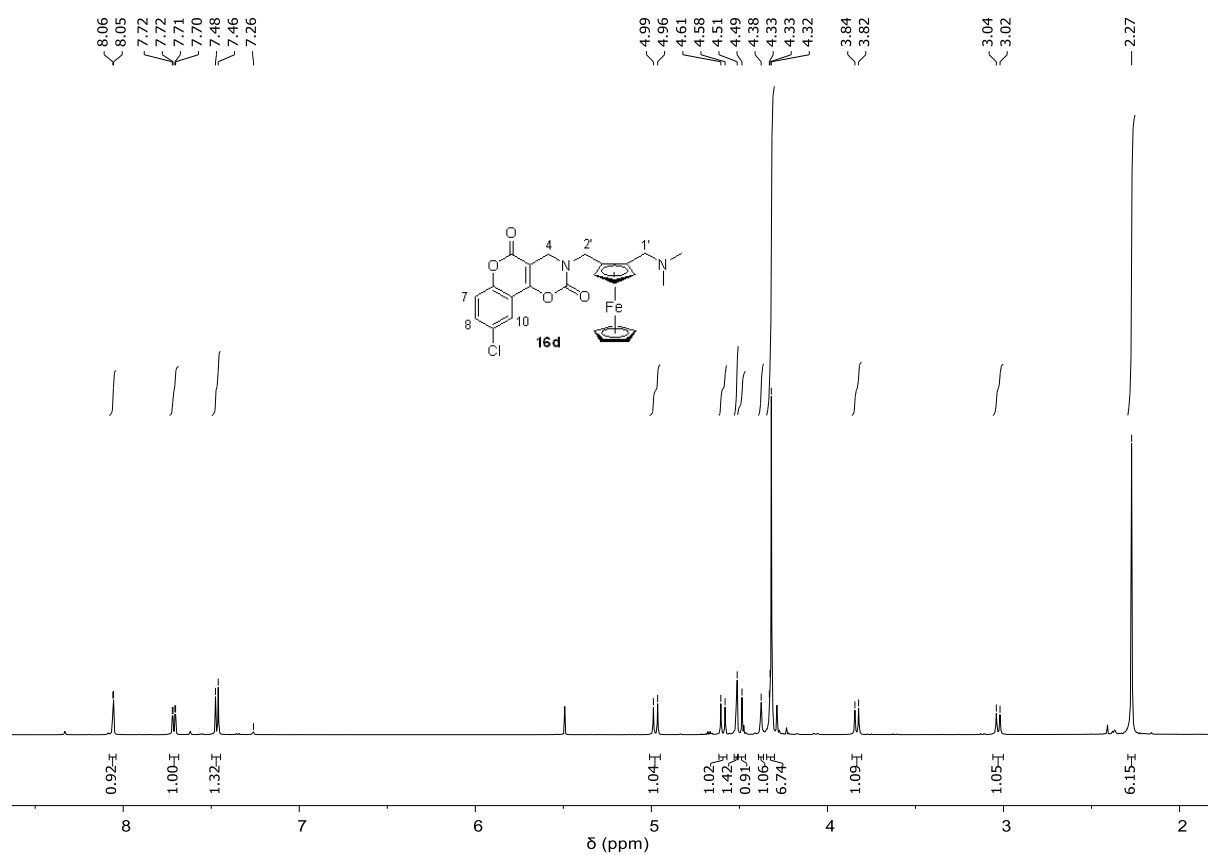

### <sup>13</sup>C NMR spectrum of compound **16d**

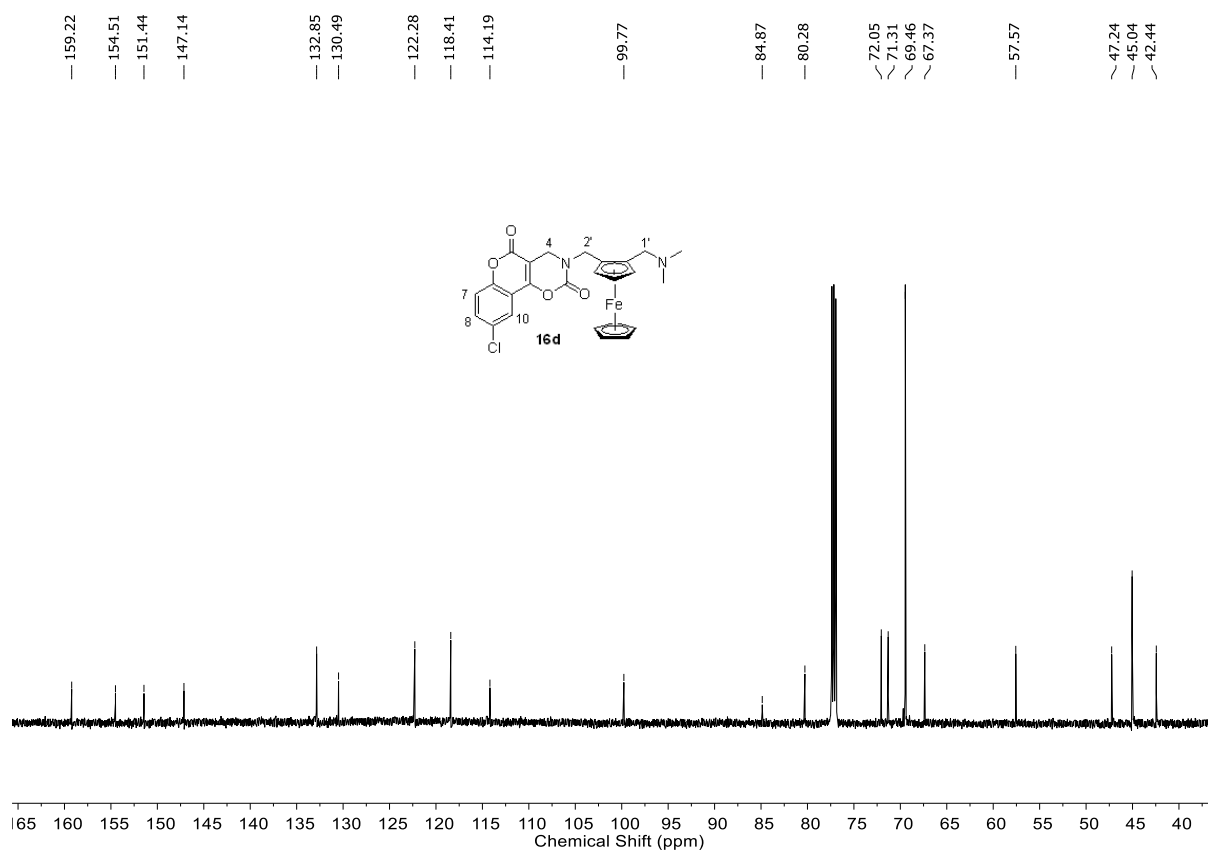



### $^1\text{H}$ NMR spectrum of compound **19**

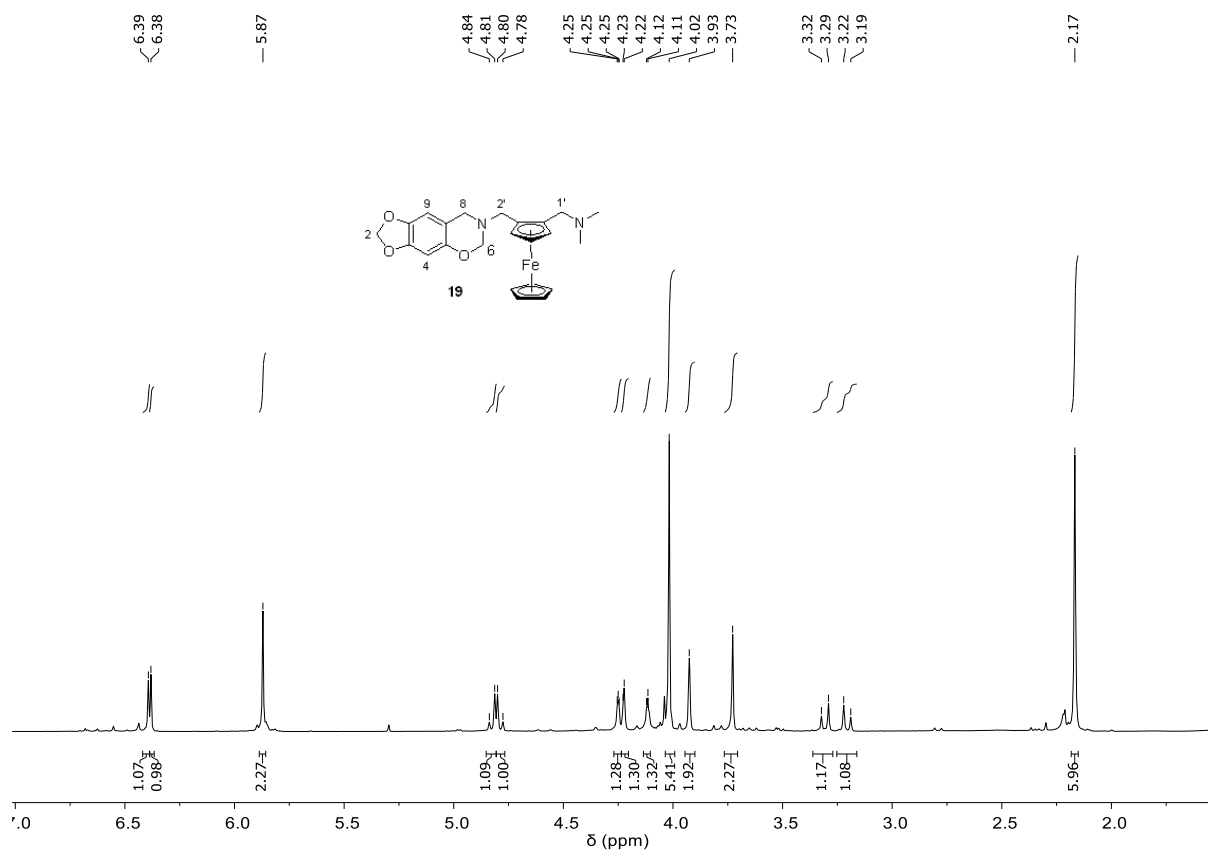

### $^{13}\text{C}$ NMR spectrum of compound **19**

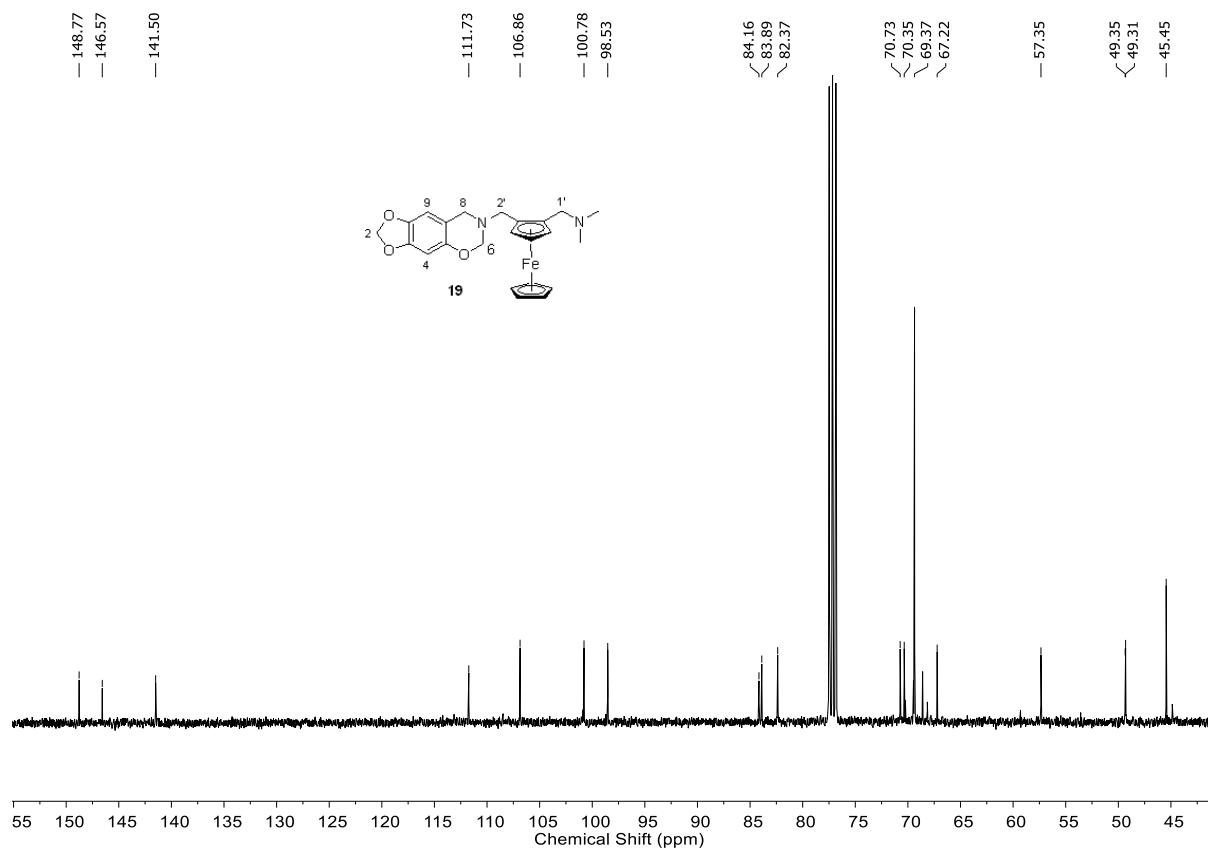

Representative COSY NMR spectrum of compound **12b**

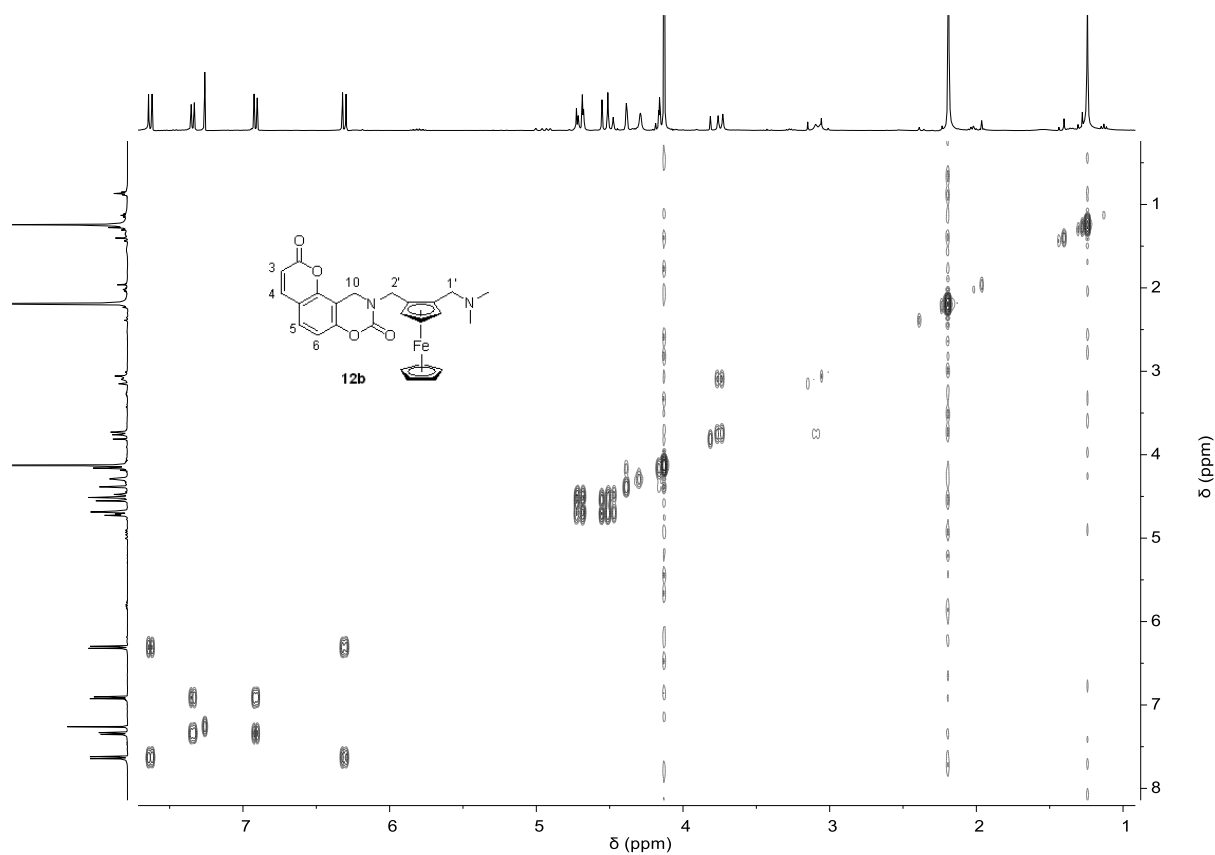

Representative HSQC spectrum of compound **12b**

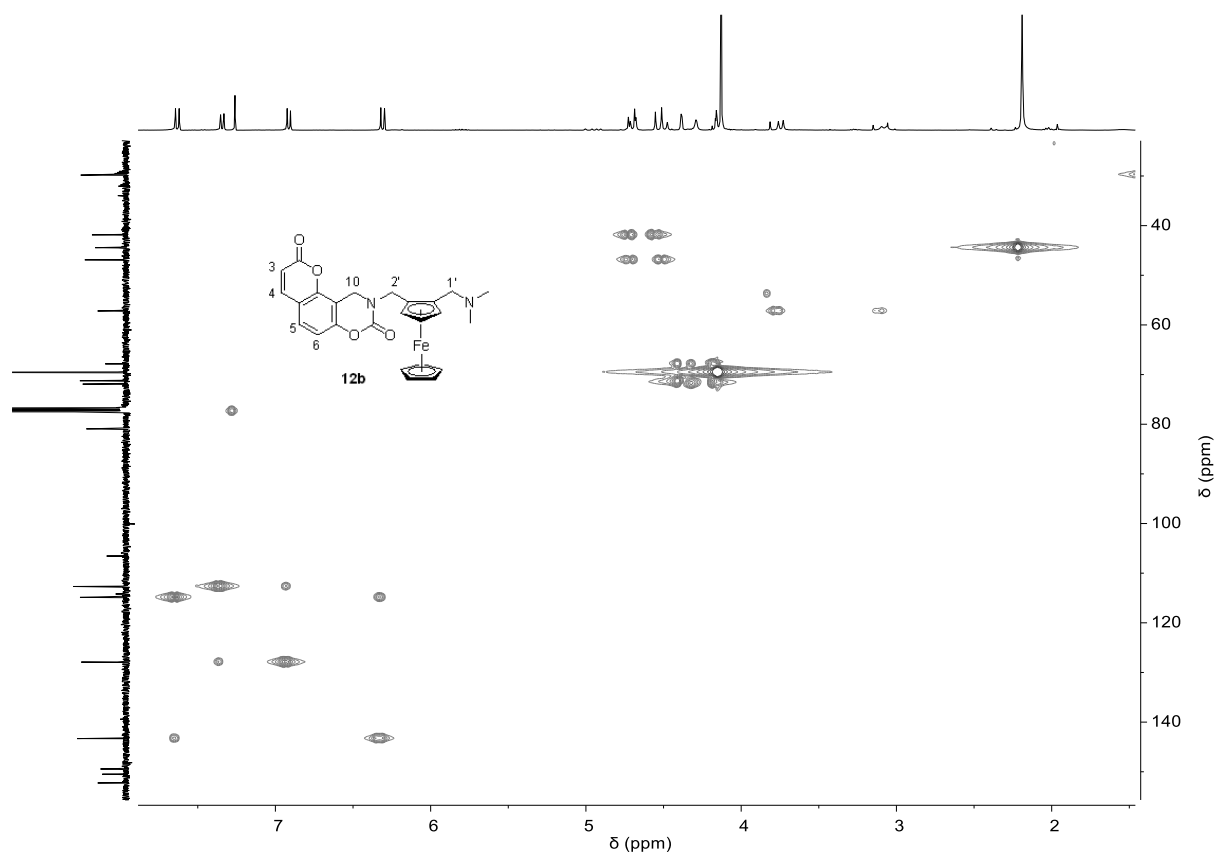

Representative HMBC spectrum of compound **12b**

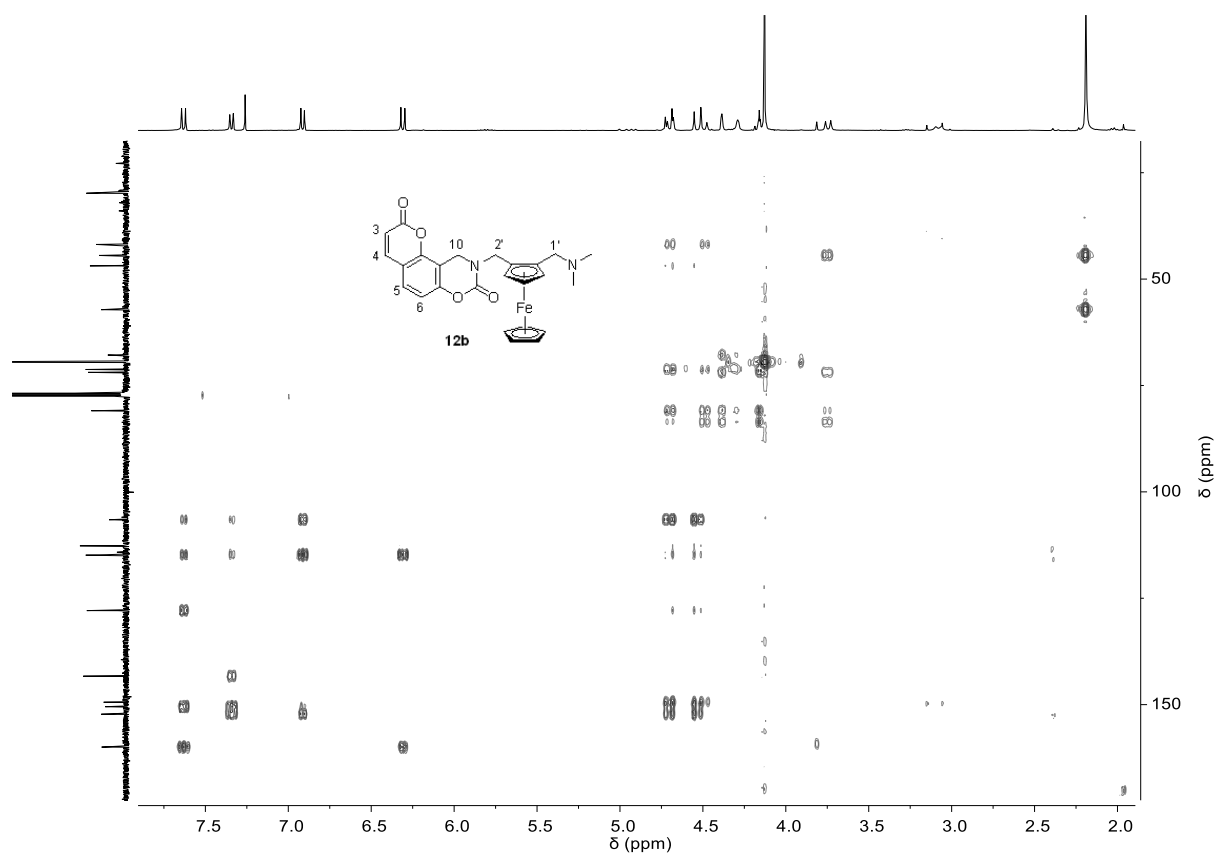

Representative COSY spectrum of compound **16d**

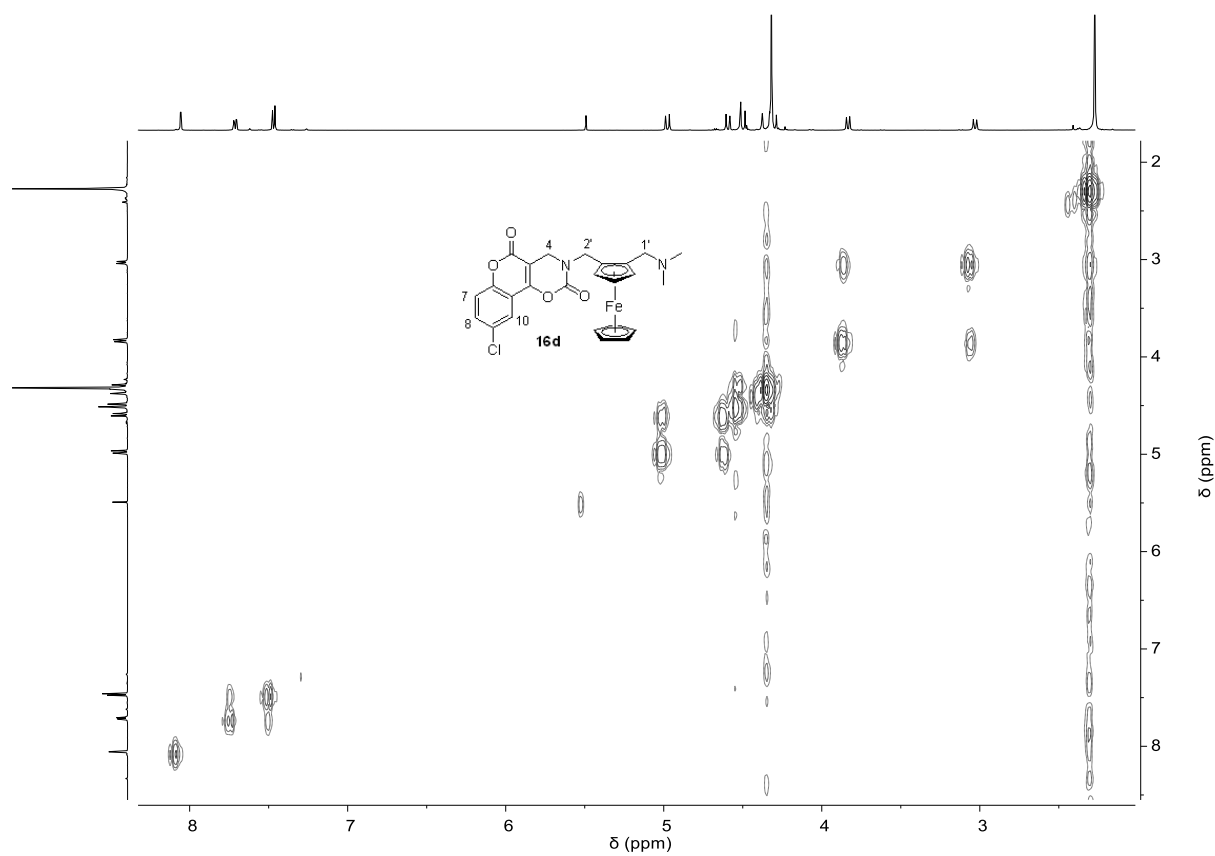

Representative HSQC spectrum of compound **16d**

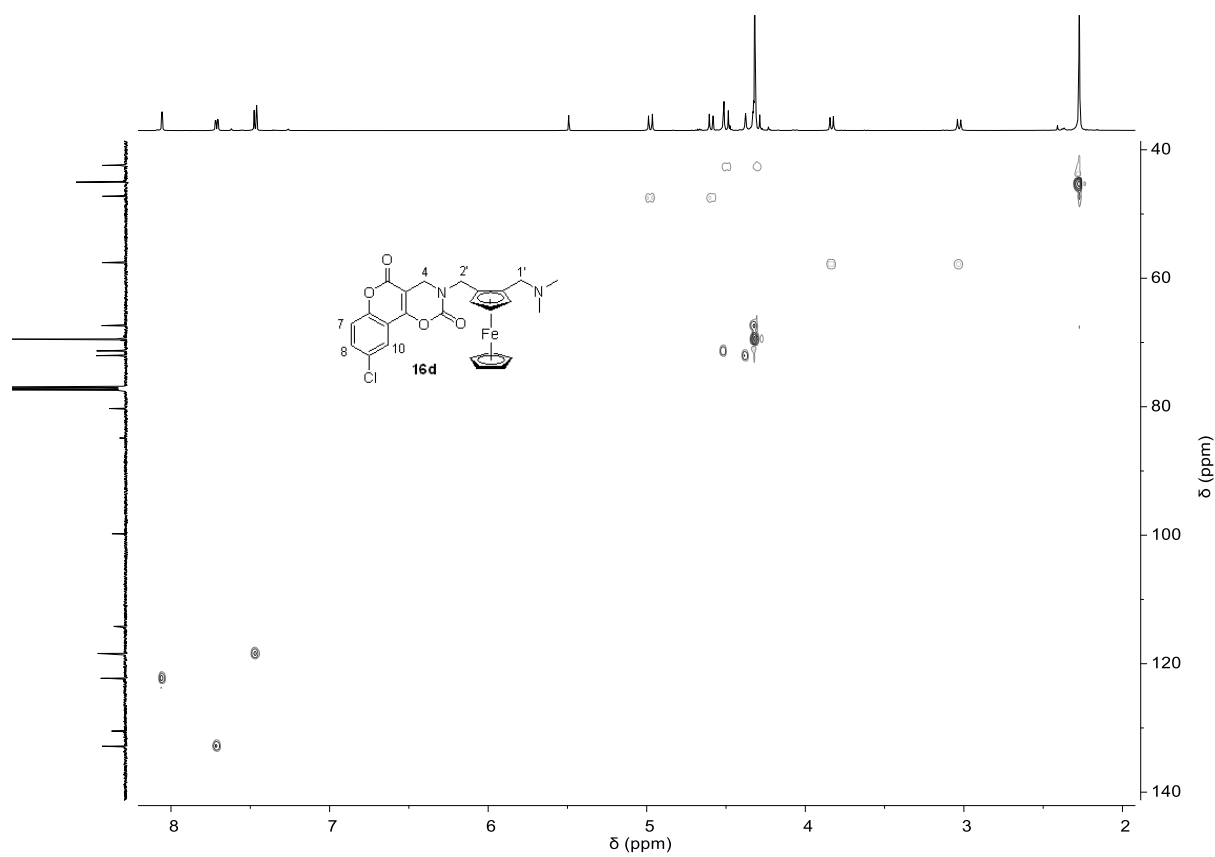

Representative HMBC spectrum of compound **16d**

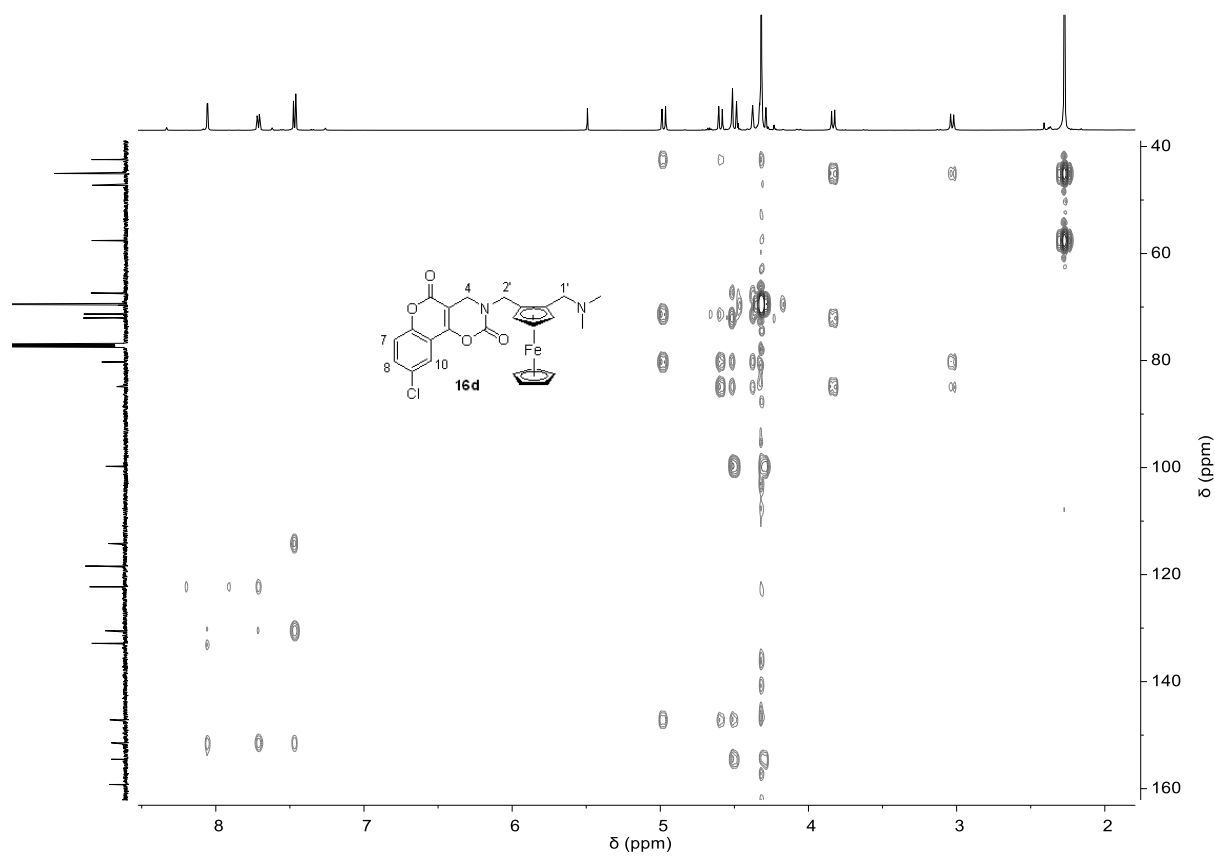

## References

1. Beteck, R. M.; Legoabe, L. J.; Isaacs, M.; Khanye, S. D.; Laming, D.; Hoppe, H. C., Anti-trypanosomal and antimalarial properties of tetralone derivatives and structurally related benzocycloalkanones. *Medicina* **2019**, 55, (5), 206.
